# Supplementary material for: Exploring fluoride effects in sterically enhanced cobalt ethylene polymerisation catalysts; a combined experimental and DFT study
Source: Royal Society of Chemistry journal article supplement (doi:10.1039/d2ra05806e), 2022-12-19
Supplement: d2ra05806e1.pdf [file d2ra05806e1.pdf]

## Supporting information

for

### Exploring fluoride effects in sterically enhanced cobalt ethylene polymerisation catalysts; a combined experimental and DFT study

Zilong Li,<sup>a</sup> Yanping Ma,<sup>a,b,\*</sup> Tian Liu,<sup>a</sup> Qiuyue Zhang,<sup>a</sup> Gregory A. Solan,<sup>b,\*</sup> Tongling Liang<sup>a</sup> and Wen-Hua Sun<sup>a,c\*</sup>

<sup>a</sup> Key Laboratory of Engineering Plastics and Beijing National Laboratory for Molecular Sciences, Institute of Chemistry, Chinese Academy of Sciences, Beijing 100190, China.

<sup>b</sup> Department of Chemistry, University of Leicester, University Road, Leicester LE1 7RH, UK.

<sup>c</sup> State Key Laboratory for Oxo Synthesis and Selective Oxidation, Lanzhou Institute of Chemical Physics, Chinese Academy of Sciences, Lanzhou 730000, China

\*Correspondence: myanping@iccas.ac.cn (Y.M.); gas8@leicester.ac.uk (G. A. S.); whsun@iccas.ac.cn (W.-H. S.); Tel.: +86-10-6255-7955

#### Table of contents

---

|    |                                                                                                                                                                                                             |         |
|----|-------------------------------------------------------------------------------------------------------------------------------------------------------------------------------------------------------------|---------|
| 1. | <b>Figures S1–S10</b> <sup>1</sup> H/ <sup>13</sup> C NMR spectra of <b>L1–L5</b> ; all recorded in CDCl <sub>3</sub> at room temperature.                                                                  | S2-S6   |
| 2. | <b>Figures S11–S15</b> <sup>19</sup> F NMR spectra of <b>L1–L5</b> ; all recorded in CDCl <sub>3</sub> at room temperature.                                                                                 | S7-S9   |
| 3. | <b>Figures S16–S20</b> <sup>19</sup> F NMR spectra of <b>Co1–Co5</b> ; all recorded in CDCl <sub>3</sub> at room temperature.                                                                               | S9-S11  |
| 4. | <b>Figure S21</b> <sup>1</sup> H NMR spectrum of the polyethylene generated using <b>Co5</b> /MMAO at 30 °C (entry 8, Table 3); recorded in tetrachloroethane- <i>d</i> <sub>2</sub> at 100 °C.             | S12     |
| 5. | <b>Figure S22</b> <sup>13</sup> C NMR spectrum of the polyethylene generated using <b>Co5</b> /MMAO at 30 °C (entry 8, Table 3); recorded in tetrachloroethane- <i>d</i> <sub>2</sub> at 100 °C (δC 74.37). | S12     |
| 6. | Coordinates of all optimized structures                                                                                                                                                                     | S13-S80 |

---



Figure S1  $^1\text{H}$  NMR spectrum of L1 in  $\text{CDCl}_3$  at room temperature



Figure S2  $^{13}\text{C}$  NMR spectrum of L1 in  $\text{CDCl}_3$  at room temperature



Figure S3  $^1\text{H}$  NMR spectrum of L2 in  $\text{CDCl}_3$  at room temperature



Figure S4  $^{13}\text{C}$  NMR spectrum of L2 in  $\text{CDCl}_3$  at room temperature



Figure S5  $^1\text{H}$  NMR spectrum of L3 in  $\text{CDCl}_3$  at room temperature



Figure S6  $^{13}\text{C}$  NMR spectrum of L3 in  $\text{CDCl}_3$  at room temperature







**Figure S11**  $^{19}\text{F}$  NMR spectrum of **L1** in  $\text{CDCl}_3$  at room temperature



**Figure S12**  $^{19}\text{F}$  NMR spectrum of **L2** in  $\text{CDCl}_3$  at room temperature



**Figure S13**  $^{19}\text{F}$  NMR spectrum of **L3** in  $\text{CDCl}_3$  at room temperature



**Figure S14**  $^{19}\text{F}$  NMR spectrum of **L4** in  $\text{CDCl}_3$  at room temperature



**Figure S15**  $^{19}\text{F}$  NMR spectrum of L5 in  $\text{CDCl}_3$  at room temperature



**Figure S16**  $^{19}\text{F}$  NMR spectrum of Co1 in  $\text{CDCl}_3$  at room temperature



**Figure S17**  $^{19}\text{F}$  NMR spectrum of **Co2** in  $\text{CDCl}_3$  at room temperature



**Figure S18**  $^{19}\text{F}$  NMR spectrum of **Co3** in  $\text{CDCl}_3$  at room temperature



**Figure S19**  $^{19}\text{F}$  NMR spectrum of **Co4** in  $\text{CDCl}_3$  at room temperature



**Figure S20**  $^{19}\text{F}$  NMR spectrum of **Co5** in  $\text{CDCl}_3$  at room temperature



**Figure S21** <sup>1</sup>H NMR spectrum of the polyethylene generated using **Co5**/MMAO at 30 °C (entry 8, Table 3); recorded in tetrachloroethane- *d*<sub>2</sub> at 100 °C.



**Figure S22** <sup>13</sup>C NMR spectrum of the polyethylene generated using **Co5**/MMAO at 30 °C (entry 8, Table 3); recorded in tetrachloroethane- *d*<sub>2</sub> at 100 °C ( $\delta$ C 74.37).

Coordinate of all optimized structures:

**1-iPr**

Doublet:

1

| Atom | x           | y           | z           |
|------|-------------|-------------|-------------|
| C    | 1.05873600  | 2.54137300  | -1.36702800 |
| C    | 1.06975500  | 3.73574400  | -2.08325200 |
| C    | -0.14735600 | 4.36398000  | -2.32842100 |
| C    | -1.33448500 | 3.79094800  | -1.88253800 |
| C    | -1.26361800 | 2.58630000  | -1.18693300 |
| N    | -0.08587600 | 2.01511100  | -0.92968800 |
| H    | -0.17189400 | 5.29943800  | -2.88029000 |
| H    | 1.99929600  | 4.16576600  | -2.44464300 |
| H    | -2.28813100 | 4.27022000  | -2.08359700 |
| C    | 2.25799400  | 1.73447000  | -1.01458100 |
| C    | -2.42942800 | 1.79190300  | -0.70996500 |
| N    | -2.12461700 | 0.63827800  | -0.23014900 |
| N    | 1.99913000  | 0.62385400  | -0.41946400 |
| C    | -3.80126200 | 2.34545500  | -0.86213600 |
| H    | -3.92978800 | 3.23599600  | -0.23243200 |
| H    | -3.97534500 | 2.65754600  | -1.89930500 |
| H    | -4.56012500 | 1.60924400  | -0.58611700 |
| C    | 3.60795300  | 2.24760500  | -1.36664500 |
| H    | 3.74270600  | 2.23314800  | -2.45699800 |
| H    | 3.72709600  | 3.28825000  | -1.04283900 |
| H    | 4.39649400  | 1.63994700  | -0.91639100 |
| C    | -3.08311700 | -0.28928300 | 0.26253100  |
| C    | -3.21936600 | -1.49356900 | -0.45757700 |
| C    | -3.71639500 | -0.07956200 | 1.49872400  |
| C    | -4.06092000 | -2.47268800 | 0.06170800  |

|   |             |             |             |
|---|-------------|-------------|-------------|
| C | -4.53432100 | -1.10358900 | 1.98335800  |
| C | -4.71503800 | -2.28105800 | 1.27401900  |
| H | -4.19544900 | -3.40797200 | -0.47659400 |
| H | -5.02892900 | -0.97716400 | 2.94471300  |
| H | -5.36034100 | -3.06064900 | 1.67159000  |
| C | 3.01383600  | -0.26075600 | 0.05083400  |
| C | 3.24787300  | -0.28270900 | 1.43916100  |
| C | 3.64761500  | -1.14591700 | -0.83528500 |
| C | 4.15783300  | -1.21637500 | 1.92896500  |
| C | 4.53937500  | -2.07188100 | -0.28889600 |
| C | 4.79554800  | -2.10831900 | 1.07430100  |
| H | 4.36596000  | -1.25214000 | 2.99624000  |
| C | 2.55632900  | 0.71261700  | 2.34921400  |
| H | 1.56023900  | 0.90119400  | 1.91069200  |
| C | 3.33819400  | -1.15996700 | -2.31919100 |
| H | 2.89874100  | -0.18976500 | -2.58985800 |
| C | -3.45322500 | 1.14535500  | 2.35293300  |
| H | -2.98961900 | 1.91796600  | 1.72434200  |
| C | -2.46203300 | -1.68726200 | -1.75421700 |
| H | -1.46486300 | -1.23329800 | -1.59445800 |
| C | -0.13034800 | -1.39296600 | 1.31751200  |
| H | 0.45755600  | -1.29443300 | 2.24212500  |
| H | -1.17774500 | -1.51434900 | 1.64237600  |
| C | 0.31314700  | -2.65454800 | 0.57520100  |
| H | 1.40676500  | -2.64267400 | 0.43415200  |
| H | -0.11044600 | -2.68210100 | -0.44393400 |
| C | -0.09865300 | -3.93359000 | 1.29085100  |
| H | 0.32410900  | -3.96779200 | 2.30346400  |
| H | -1.19235400 | -3.98161500 | 1.39246200  |
| H | 0.23034200  | -4.83555200 | 0.75840900  |

|    |             |             |             |
|----|-------------|-------------|-------------|
| Co | -0.03537400 | 0.19016900  | 0.12123000  |
| C  | -3.14428000 | -0.95145100 | -2.90763500 |
| H  | -3.26724800 | 0.12093500  | -2.71332700 |
| H  | -2.57267700 | -1.06282600 | -3.83729800 |
| H  | -4.14469900 | -1.37014600 | -3.07894500 |
| C  | -2.25562500 | -3.14741300 | -2.13455300 |
| H  | -3.19493000 | -3.61266000 | -2.46104400 |
| H  | -1.55336100 | -3.22046200 | -2.97386600 |
| H  | -1.85460300 | -3.74348100 | -1.30577700 |
| C  | -4.73190000 | 1.74381700  | 2.93144000  |
| H  | -5.19208200 | 1.07986500  | 3.67354700  |
| H  | -4.51343900 | 2.68941200  | 3.44192000  |
| H  | -5.47981900 | 1.94161000  | 2.15363200  |
| C  | -2.45790900 | 0.81408200  | 3.46597500  |
| H  | -2.26068600 | 1.69814400  | 4.08519800  |
| H  | -2.85279700 | 0.02759200  | 4.12200800  |
| H  | -1.49811900 | 0.45599200  | 3.06736500  |
| H  | 5.49631300  | -2.83671700 | 1.47524600  |
| H  | 5.04023900  | -2.77910200 | -0.94725400 |
| C  | 2.34114700  | 0.20291000  | 3.76775700  |
| H  | 1.88322500  | -0.79301800 | 3.78706300  |
| H  | 3.28436700  | 0.15055400  | 4.32667500  |
| H  | 1.68375600  | 0.88797100  | 4.31670000  |
| C  | 3.32069800  | 2.03519600  | 2.38433900  |
| H  | 4.32757700  | 1.88007300  | 2.79439000  |
| H  | 3.43836300  | 2.47872700  | 1.38779800  |
| H  | 2.80950000  | 2.76688400  | 3.02228900  |
| C  | 4.58455600  | -1.34050100 | -3.17915900 |
| H  | 4.33559100  | -1.21130600 | -4.23906400 |
| H  | 5.36578500  | -0.61430400 | -2.92241000 |

|   |            |             |             |
|---|------------|-------------|-------------|
| H | 5.01404300 | -2.34439500 | -3.07332600 |
| C | 2.30021500 | -2.23517300 | -2.63928600 |
| H | 2.08532100 | -2.26354200 | -3.71480200 |
| H | 2.66504100 | -3.22693200 | -2.34081800 |
| H | 1.35406000 | -2.06305300 | -2.10809300 |

## 2

| Atom | x           | y           | z           |
|------|-------------|-------------|-------------|
| C    | 1.06134200  | 2.56666200  | -1.16157700 |
| C    | 1.05817100  | 3.76888100  | -1.86378000 |
| C    | -0.16790500 | 4.32867800  | -2.21378300 |
| C    | -1.35317500 | 3.67373000  | -1.89228700 |
| C    | -1.27902800 | 2.47649700  | -1.18449200 |
| N    | -0.09187500 | 1.98268300  | -0.80576300 |
| H    | -0.19817300 | 5.26706500  | -2.75970600 |
| H    | 1.98937500  | 4.25689700  | -2.13746400 |
| H    | -2.31296700 | 4.08573300  | -2.19107500 |
| C    | 2.22602600  | 1.75003200  | -0.78742600 |
| C    | -2.39061900 | 1.58887100  | -0.81004700 |
| N    | -2.03245400 | 0.49934000  | -0.19547400 |
| N    | 1.93259300  | 0.62555300  | -0.20226400 |
| C    | -3.77458500 | 1.97604300  | -1.19600500 |
| H    | -3.80973300 | 2.26364500  | -2.25355400 |
| H    | -4.49527700 | 1.17418600  | -1.02603200 |
| H    | -4.08836600 | 2.85606000  | -0.61790900 |
| C    | 3.58612600  | 2.23103200  | -1.14716200 |
| H    | 3.83925200  | 3.11165400  | -0.54048500 |
| H    | 4.35011900  | 1.46789000  | -0.98492700 |
| H    | 3.61927100  | 2.54932000  | -2.19578700 |
| C    | -3.04137500 | -0.48724300 | 0.07973200  |

|   |             |             |             |
|---|-------------|-------------|-------------|
| C | -3.15238300 | -1.55370300 | -0.83350500 |
| C | -3.85359100 | -0.40339300 | 1.22231600  |
| C | -4.13802300 | -2.51181700 | -0.60488800 |
| C | -4.81940900 | -1.39609800 | 1.40744500  |
| C | -4.97176400 | -2.43483900 | 0.50298800  |
| H | -4.25434600 | -3.33528800 | -1.30661900 |
| C | 2.97992500  | -0.32944300 | 0.03424400  |
| C | 3.78347100  | -0.26122900 | 1.18471800  |
| C | 3.12419900  | -1.36010700 | -0.91572600 |
| C | 4.74773700  | -1.25622200 | 1.36370300  |
| C | 4.10168900  | -2.32702200 | -0.68544300 |
| C | 4.90694000  | -2.28188200 | 0.44495900  |
| H | 5.38249900  | -1.22574300 | 2.24774800  |
| H | 4.23738300  | -3.13048600 | -1.40675400 |
| H | 5.66226200  | -3.04725500 | 0.60620400  |
| C | 3.64727400  | 0.82619400  | 2.23190800  |
| H | 2.76984600  | 1.43802400  | 1.97545700  |
| C | 2.29655000  | -1.39555600 | -2.18715200 |
| H | 1.36475300  | -0.83818500 | -1.99582200 |
| C | -3.73217600 | 0.69961800  | 2.25416700  |
| H | -2.86827100 | 1.32458600  | 1.98637200  |
| C | -2.25523700 | -1.64633300 | -2.05221800 |
| H | -1.34346300 | -1.06673200 | -1.83425300 |
| C | -0.02828900 | -1.53866200 | 0.60900900  |
| H | -1.07790500 | -1.85333700 | 0.71232600  |
| H | 0.30397400  | -1.86536600 | -0.39776400 |
| C | 0.78441500  | -2.28187100 | 1.65221900  |
| H | 0.35998400  | -2.10216200 | 2.65242500  |
| H | 1.82229600  | -1.92012300 | 1.68768300  |
| C | 0.80288200  | -3.78292100 | 1.39045400  |

|    |             |             |             |
|----|-------------|-------------|-------------|
| H  | -0.21627900 | -4.18830200 | 1.32855400  |
| H  | 1.30647700  | -4.00801200 | 0.43982400  |
| H  | 1.33243700  | -4.33002100 | 2.18003700  |
| Co | -0.03685000 | 0.38544200  | 0.22609200  |
| C  | -0.06755600 | 0.56404500  | 2.35193600  |
| H  | 0.86722200  | 0.13723300  | 2.70625200  |
| H  | -0.97214700 | 0.05540000  | 2.68008400  |
| C  | -0.10935300 | 1.83847800  | 1.86457800  |
| H  | -1.04822900 | 2.38295400  | 1.76905900  |
| H  | 0.79349700  | 2.44501500  | 1.79547400  |
| C  | 4.87074900  | 1.74239400  | 2.25109200  |
| H  | 4.74211900  | 2.54292500  | 2.99002000  |
| H  | 5.77293600  | 1.18252300  | 2.52864200  |
| H  | 5.06100800  | 2.20652300  | 1.27676500  |
| C  | 3.42314500  | 0.24689000  | 3.62937700  |
| H  | 3.15069800  | 1.04160100  | 4.33452000  |
| H  | 2.63177600  | -0.51216500 | 3.64663800  |
| H  | 4.33448100  | -0.22855900 | 4.01301200  |
| C  | 3.03875500  | -0.70431000 | -3.33177400 |
| H  | 3.97963900  | -1.22842800 | -3.54653000 |
| H  | 2.43627400  | -0.71102500 | -4.24862400 |
| H  | 3.29230400  | 0.33764400  | -3.10215800 |
| C  | 1.90798300  | -2.80676800 | -2.61295200 |
| H  | 1.44003700  | -3.37103200 | -1.79645800 |
| H  | 1.19904300  | -2.76381400 | -3.44900000 |
| H  | 2.77498300  | -3.37962400 | -2.96484800 |
| H  | -5.73552200 | -3.19190900 | 0.66381800  |
| H  | -5.46546300 | -1.34753300 | 2.28253100  |
| C  | -1.82787100 | -3.07691500 | -2.35857100 |
| H  | -1.39333200 | -3.56761400 | -1.47833100 |

|   |             |             |             |
|---|-------------|-------------|-------------|
| H | -2.66796200 | -3.68935400 | -2.70882600 |
| H | -1.07833300 | -3.08474900 | -3.15910200 |
| C | -2.93032900 | -1.02090300 | -3.27203200 |
| H | -3.86524800 | -1.54698600 | -3.50678500 |
| H | -3.17888600 | 0.03558800  | -3.10948400 |
| H | -2.28123900 | -1.08199000 | -4.15437900 |
| C | -4.97195000 | 1.59246500  | 2.27744300  |
| H | -4.85321500 | 2.39896400  | 3.01147400  |
| H | -5.17648400 | 2.04836000  | 1.30171000  |
| H | -5.86229000 | 1.01786600  | 2.56330800  |
| C | -3.47899200 | 0.13153100  | 3.65138300  |
| H | -3.20516700 | 0.93235300  | 4.34916400  |
| H | -4.37672000 | -0.35646400 | 4.05095100  |
| H | -2.67644400 | -0.61656700 | 3.65553500  |

### TS-2/3

| Atom | x           | y          | z          |
|------|-------------|------------|------------|
| C    | -1.03946100 | 2.70301100 | 0.94435100 |
| C    | -1.01716400 | 3.95313900 | 1.55349000 |
| C    | 0.20717000  | 4.49513700 | 1.93543700 |
| C    | 1.37953900  | 3.77493800 | 1.72400500 |
| C    | 1.30460100  | 2.53126000 | 1.10474300 |
| N    | 0.11351600  | 2.04088800 | 0.69562500 |
| H    | 0.24546000  | 5.46822400 | 2.41567900 |
| H    | -1.94279700 | 4.49175300 | 1.73625600 |
| H    | 2.33887800  | 4.17444300 | 2.04078400 |
| C    | -2.21122700 | 1.91455600 | 0.58460600 |
| C    | 2.39987700  | 1.60865500 | 0.83472800 |
| N    | 2.02321500  | 0.48071000 | 0.29296100 |
| N    | -1.92277700 | 0.71784600 | 0.14362900 |

|   |             |             |             |
|---|-------------|-------------|-------------|
| C | 3.79071800  | 1.98095400  | 1.21338800  |
| H | 3.81586300  | 2.34678200  | 2.24701800  |
| H | 4.47490000  | 1.13381400  | 1.12854800  |
| H | 4.16380700  | 2.79355700  | 0.57558900  |
| C | -3.57539700 | 2.46746700  | 0.80560800  |
| H | -3.77950500 | 3.26874800  | 0.08259600  |
| H | -4.34780700 | 1.70188600  | 0.70267400  |
| H | -3.65818800 | 2.91161900  | 1.80453600  |
| C | 2.99279600  | -0.52081300 | -0.02979000 |
| C | 2.99562600  | -1.68953400 | 0.76222900  |
| C | 3.84095400  | -0.38485400 | -1.14604500 |
| C | 3.85919500  | -2.72363700 | 0.40845600  |
| C | 4.67370600  | -1.46170300 | -1.46469100 |
| C | 4.68613100  | -2.61902300 | -0.70344900 |
| H | 3.88483600  | -3.63026100 | 1.00848200  |
| C | -2.95855600 | -0.25810000 | -0.02212100 |
| C | -3.76247900 | -0.31515400 | -1.17360800 |
| C | -3.08348700 | -1.20416000 | 1.01879900  |
| C | -4.70768300 | -1.34197200 | -1.25640300 |
| C | -4.03874500 | -2.20901300 | 0.88179900  |
| C | -4.84624800 | -2.28181300 | -0.24690500 |
| H | -5.34517900 | -1.40231800 | -2.13701700 |
| H | -4.15562800 | -2.94712600 | 1.67260000  |
| H | -5.58685400 | -3.07297100 | -0.33651700 |
| C | -3.65111600 | 0.67421000  | -2.31732200 |
| H | -2.78029500 | 1.31889800  | -2.12583700 |
| C | -2.24814300 | -1.09673500 | 2.28127500  |
| H | -1.29707500 | -0.60850700 | 2.00917200  |
| C | 3.92643400  | 0.86920600  | -1.99637800 |
| H | 3.22611700  | 1.61389500  | -1.59245600 |

|    |             |             |             |
|----|-------------|-------------|-------------|
| C  | 2.11994400  | -1.79474200 | 1.99534000  |
| H  | 1.21425900  | -1.19530100 | 1.80597100  |
| C  | 0.01319300  | -1.52692800 | -0.81806600 |
| H  | 1.05659500  | -1.85885200 | -0.83457400 |
| H  | -0.32941000 | -1.52636400 | 0.23982300  |
| C  | -0.85105300 | -2.53109600 | -1.55595900 |
| H  | -0.53233100 | -2.60083100 | -2.60608500 |
| H  | -1.89932900 | -2.20178800 | -1.56341400 |
| C  | -0.75196800 | -3.90722600 | -0.91543800 |
| H  | 0.28632000  | -4.26535900 | -0.89839900 |
| H  | -1.12082500 | -3.89515800 | 0.11909700  |
| H  | -1.34846500 | -4.64290200 | -1.46612200 |
| Co | 0.04223500  | 0.43998200  | -0.19662100 |
| C  | 0.01684800  | -0.11189900 | -2.20313100 |
| H  | -0.95345000 | -0.37985900 | -2.61692100 |
| H  | 0.83780200  | -0.64781200 | -2.68444000 |
| C  | 0.20729000  | 1.28777100  | -1.95106400 |
| H  | 1.19003300  | 1.72840000  | -2.12623800 |
| H  | -0.62491400 | 1.96414500  | -2.15716800 |
| C  | -4.89096400 | 1.56511800  | -2.41070600 |
| H  | -4.77526600 | 2.30285000  | -3.21422600 |
| H  | -5.78185600 | 0.96689600  | -2.64136700 |
| H  | -5.09218800 | 2.10618800  | -1.47978900 |
| C  | -3.43835600 | -0.02289700 | -3.66185900 |
| H  | -3.19771000 | 0.71203200  | -4.43942600 |
| H  | -2.63143700 | -0.76502800 | -3.63439000 |
| H  | -4.34644800 | -0.54850300 | -3.98305800 |
| C  | -2.94320100 | -0.20733400 | 3.31290800  |
| H  | -3.91743900 | -0.63322200 | 3.58748300  |
| H  | -2.34192000 | -0.12810900 | 4.22703600  |

|   |             |             |             |
|---|-------------|-------------|-------------|
| H | -3.12071100 | 0.80789700  | 2.93846500  |
| C | -1.91266900 | -2.44214100 | 2.91208700  |
| H | -1.48179900 | -3.14719900 | 2.18953900  |
| H | -1.18728800 | -2.30149800 | 3.72357800  |
| H | -2.79618600 | -2.91740800 | 3.35708000  |
| H | 5.34571800  | -3.44108300 | -0.97079500 |
| H | 5.33353000  | -1.38084200 | -2.32709800 |
| C | 3.53569200  | 0.61248500  | -3.45026800 |
| H | 2.51886200  | 0.21383200  | -3.54382900 |
| H | 3.58304000  | 1.54387700  | -4.02805300 |
| H | 4.21835900  | -0.10264900 | -3.92590500 |
| C | 5.33067700  | 1.47411600  | -1.94246400 |
| H | 5.35404900  | 2.43665700  | -2.46795400 |
| H | 5.67487400  | 1.63751500  | -0.91462500 |
| H | 6.06193200  | 0.81863300  | -2.43199900 |
| C | 2.82719900  | -1.18876800 | 3.20762100  |
| H | 3.09190400  | -0.13565600 | 3.05137200  |
| H | 2.18953300  | -1.24597500 | 4.09883700  |
| H | 3.75490800  | -1.73567600 | 3.42257300  |
| C | 1.68255200  | -3.22018700 | 2.30810500  |
| H | 0.95088600  | -3.22022600 | 3.12463600  |
| H | 1.22395400  | -3.71307300 | 1.44080200  |
| H | 2.52449600  | -3.84037700 | 2.64088000  |

### 3

| Atom | x           | y           | z           |
|------|-------------|-------------|-------------|
| C    | -0.63521700 | -3.25542000 | -0.23358900 |
| C    | -0.45303900 | -4.63456100 | -0.23985500 |
| C    | 0.84802100  | -5.12780400 | -0.32840300 |
| C    | 1.93468200  | -4.25569300 | -0.38264500 |
| C    | 1.68166900  | -2.88815800 | -0.36607800 |
| N    | 0.42108100  | -2.43243600 | -0.32664400 |

|   |             |             |             |
|---|-------------|-------------|-------------|
| H | 1.01818900  | -6.20041300 | -0.33573600 |
| H | -1.30087000 | -5.31029000 | -0.16662600 |
| H | 2.95206200  | -4.63496900 | -0.42027400 |
| C | -1.88799400 | -2.49063500 | -0.12129700 |
| C | 2.64685200  | -1.77840300 | -0.32512700 |
| N | 2.10741600  | -0.61048300 | -0.10875600 |
| N | -1.71348800 | -1.20508800 | 0.00314400  |
| C | 4.09223100  | -2.05574200 | -0.52163800 |
| H | 4.52137600  | -2.50082800 | 0.38726800  |
| H | 4.23020400  | -2.77989800 | -1.33294500 |
| H | 4.65423900  | -1.14783300 | -0.75273500 |
| C | -3.19339500 | -3.19503000 | -0.18458100 |
| H | -3.19730200 | -3.92564700 | -1.00186000 |
| H | -3.36296500 | -3.75274300 | 0.74703700  |
| H | -4.02285600 | -2.49857200 | -0.32694600 |
| C | 2.93735100  | 0.55434800  | -0.03194700 |
| C | 2.85853800  | 1.47586900  | -1.09443000 |
| C | 3.73005000  | 0.78597900  | 1.10403600  |
| C | 3.65061200  | 2.61961400  | -1.02180900 |
| C | 4.49008600  | 1.95821200  | 1.13212700  |
| C | 4.46513700  | 2.85851800  | 0.07923500  |
| H | 3.62314200  | 3.34543800  | -1.83070200 |
| C | -2.83128200 | -0.30912700 | -0.04677300 |
| C | -3.63730900 | -0.06969900 | 1.07476600  |
| C | -3.00433100 | 0.38602200  | -1.26032500 |
| C | -4.65881500 | 0.87531300  | 0.94085800  |
| C | -4.04803200 | 1.30313700  | -1.34594000 |
| C | -4.87074300 | 1.54867100  | -0.25178900 |
| H | -5.30076400 | 1.08202600  | 1.79560600  |
| H | -4.21077700 | 1.84966600  | -2.27172800 |
| H | -5.67568500 | 2.27539100  | -0.33084600 |
| C | -3.45141700 | -0.78122100 | 2.39987000  |
| H | -2.59359500 | -1.46332700 | 2.30690300  |
| C | -2.05228600 | 0.14393300  | -2.41526000 |
| H | -1.06048100 | -0.05779500 | -1.96013100 |
| C | 3.75555500  | -0.14036400 | 2.30458300  |
| H | 3.16431900  | -1.03585500 | 2.06829900  |
| C | 1.92914200  | 1.21813200  | -2.26447100 |
| H | 0.99083900  | 0.82595900  | -1.82355500 |
| C | -0.08674700 | 1.05368300  | 1.00047500  |
| H | -0.83688000 | 0.82208800  | 1.77837100  |
| H | 0.84998200  | 1.30990100  | 1.52258600  |
| C | -0.55449900 | 2.26237100  | 0.20805200  |
| H | -1.41949500 | 2.00072600  | -0.42048200 |

|    |             |             |             |
|----|-------------|-------------|-------------|
| H  | 0.24326100  | 2.57980100  | -0.48442700 |
| C  | -0.95882300 | 3.46107800  | 1.05666100  |
| H  | -1.74604000 | 3.15488900  | 1.76651900  |
| H  | -0.10484400 | 3.78900300  | 1.67185200  |
| Co | 0.15466500  | -0.60948700 | 0.02122200  |
| C  | -1.46897700 | 4.62126200  | 0.21482900  |
| H  | -0.69236400 | 4.91134800  | -0.51114000 |
| H  | -2.32687000 | 4.27327500  | -0.38415100 |
| C  | -1.87190800 | 5.82399500  | 1.04920600  |
| H  | -2.23773900 | 6.65173500  | 0.43112800  |
| H  | -2.66821000 | 5.56266000  | 1.75820500  |
| H  | -1.02357800 | 6.19895800  | 1.63623800  |
| C  | -3.13969200 | 0.19590500  | 3.53185300  |
| H  | -3.96708400 | 0.89818800  | 3.69352500  |
| H  | -2.98285300 | -0.34649700 | 4.47216900  |
| H  | -2.23886500 | 0.78633400  | 3.32802300  |
| C  | -4.68473800 | -1.61182200 | 2.75514300  |
| H  | -5.55212700 | -0.96510700 | 2.93875100  |
| H  | -4.95913400 | -2.30913300 | 1.95477100  |
| H  | -4.51022300 | -2.19181500 | 3.66942800  |
| C  | -2.45107700 | -1.08237300 | -3.23413400 |
| H  | -3.44326600 | -0.93292900 | -3.67998200 |
| H  | -1.73837600 | -1.25121100 | -4.05113800 |
| H  | -2.49586300 | -1.99944700 | -2.63400700 |
| C  | -1.89421900 | 1.34594800  | -3.33571800 |
| H  | -1.10513300 | 1.14870600  | -4.07221100 |
| H  | -2.81212800 | 1.54077400  | -3.90485100 |
| H  | -1.63351600 | 2.25981000  | -2.78575700 |
| H  | 5.10780300  | 2.16972800  | 2.00358300  |
| H  | 5.07130200  | 3.76034400  | 0.11876100  |
| C  | 3.10443100  | 0.52263100  | 3.51762800  |
| H  | 2.06408400  | 0.80489300  | 3.31655700  |
| H  | 3.11266200  | -0.15656800 | 4.37899600  |
| H  | 3.64633500  | 1.43187700  | 3.80678300  |
| C  | 5.17315200  | -0.59475700 | 2.64836900  |
| H  | 5.69154800  | -1.02975200 | 1.78504000  |
| H  | 5.78408400  | 0.24152000  | 3.01065200  |
| H  | 5.15111200  | -1.34617000 | 3.44693000  |
| C  | 1.58509700  | 2.47545400  | -3.05158700 |
| H  | 0.82036400  | 2.25261900  | -3.80386300 |
| H  | 1.20339000  | 3.28219400  | -2.41371000 |
| H  | 2.45927800  | 2.85610200  | -3.59547800 |
| C  | 2.47429900  | 0.16094700  | -3.22521800 |
| H  | 3.42247900  | 0.49672600  | -3.66523500 |

|   |            |             |             |
|---|------------|-------------|-------------|
| H | 2.65635000 | -0.80736400 | -2.74361600 |
| H | 1.76625500 | -0.00758600 | -4.04750600 |

## 1-iPr

Quartet:

1

| Atom | x           | y           | z           |
|------|-------------|-------------|-------------|
| C    | 0.98538000  | 2.59989200  | -1.26869100 |
| C    | 0.99555500  | 3.86761500  | -1.84568900 |
| C    | -0.22452300 | 4.46884000  | -2.13574700 |
| C    | -1.41290000 | 3.79389200  | -1.87503300 |
| C    | -1.33817300 | 2.52756700  | -1.30060000 |
| N    | -0.16163900 | 1.98066600  | -0.98795800 |
| H    | -0.24773100 | 5.45903600  | -2.58229800 |
| H    | 1.93012800  | 4.37219800  | -2.07216300 |
| H    | -2.37083300 | 4.24183700  | -2.12201300 |
| C    | 2.19440500  | 1.79724800  | -0.95152000 |
| C    | -2.50122100 | 1.64076500  | -1.02675900 |
| N    | -2.18604000 | 0.47836000  | -0.57894700 |
| N    | 1.95316400  | 0.63499200  | -0.45449400 |
| C    | -3.87125500 | 2.12750800  | -1.33927400 |
| H    | -3.92327500 | 2.46147800  | -2.38335300 |
| H    | -4.61870200 | 1.34653800  | -1.18255000 |
| H    | -4.12727600 | 2.99275800  | -0.71409000 |
| C    | 3.53203400  | 2.36533100  | -1.27310500 |
| H    | 3.74699500  | 3.23725000  | -0.64085400 |
| H    | 4.32571400  | 1.62863800  | -1.12831600 |
| H    | 3.55351500  | 2.71014600  | -2.31402100 |
| C    | -3.13456100 | -0.53209200 | -0.26338800 |
| C    | -3.13487500 | -1.67448100 | -1.08203200 |
| C    | -3.89947000 | -0.44229100 | 0.91457300  |
| C    | -3.99488000 | -2.71689000 | -0.74090700 |
| C    | -4.72818200 | -1.52239100 | 1.21920800  |
| C    | -4.78900300 | -2.63964300 | 0.39547100  |
| H    | -4.03048600 | -3.61034200 | -1.35989900 |
| C    | 2.98707500  | -0.26092800 | -0.06156600 |
| C    | 3.76543200  | 0.00947600  | 1.07904000  |
| C    | 3.09810900  | -1.47044300 | -0.77539000 |
| C    | 4.67777600  | -0.96836600 | 1.48201300  |
| C    | 4.03397900  | -2.40384400 | -0.33752400 |
| C    | 4.81740800  | -2.15851100 | 0.78399800  |
| H    | 5.28417200  | -0.79501600 | 2.36880000  |
| H    | 4.14605400  | -3.34314200 | -0.87389900 |

|    |             |             |             |
|----|-------------|-------------|-------------|
| H  | 5.53605800  | -2.90268100 | 1.11845600  |
| C  | 3.57667200  | 1.25437800  | 1.92546300  |
| H  | 3.07514000  | 2.02110200  | 1.32162800  |
| C  | 2.24415600  | -1.71314700 | -2.00132300 |
| H  | 1.25999500  | -1.25846400 | -1.79123900 |
| C  | -3.74186200 | 0.73246800  | 1.86286700  |
| H  | -3.70774000 | 1.65633200  | 1.26688600  |
| C  | -2.21319300 | -1.74540500 | -2.28303100 |
| H  | -1.28454000 | -1.21871600 | -1.99225500 |
| C  | -0.08857400 | -1.72692100 | 0.76725000  |
| H  | -1.13587700 | -2.01166500 | 0.97388100  |
| H  | 0.23127200  | -2.39105800 | -0.06003100 |
| C  | 0.74751300  | -2.04042900 | 2.00209200  |
| H  | 0.33505800  | -1.50474500 | 2.87308900  |
| H  | 1.77526600  | -1.66415500 | 1.88360500  |
| C  | 0.80864600  | -3.52955100 | 2.31154500  |
| H  | -0.19797600 | -3.94929000 | 2.44071200  |
| H  | 1.28661900  | -4.07419700 | 1.48497100  |
| H  | 1.38161600  | -3.74365800 | 3.22281200  |
| Co | -0.12384400 | 0.06808700  | -0.08244300 |
| C  | 4.89801400  | 1.85551000  | 2.39366500  |
| H  | 4.72282400  | 2.82230300  | 2.88030200  |
| H  | 5.40199400  | 1.21665400  | 3.12916300  |
| H  | 5.59236600  | 2.01554600  | 1.55924000  |
| C  | 2.66202900  | 0.95925600  | 3.11375200  |
| H  | 2.54889000  | 1.84927300  | 3.74534200  |
| H  | 1.66097300  | 0.64422000  | 2.78846900  |
| H  | 3.07415500  | 0.15352800  | 3.73548500  |
| C  | 2.84106700  | -1.02099200 | -3.22608000 |
| H  | 3.82631400  | -1.44670300 | -3.45804100 |
| H  | 2.20083000  | -1.16186300 | -4.10592800 |
| H  | 2.97658300  | 0.05711100  | -3.07588600 |
| C  | 2.00816300  | -3.18581800 | -2.30340000 |
| H  | 1.62913000  | -3.73239600 | -1.43053800 |
| H  | 1.27552600  | -3.28914600 | -3.11280600 |
| H  | 2.92629200  | -3.68341700 | -2.64175900 |
| H  | -5.44874000 | -3.46471300 | 0.65309800  |
| H  | -5.33540800 | -1.49610500 | 2.12062200  |
| C  | -1.81887000 | -3.16607800 | -2.66097600 |
| H  | -1.39989700 | -3.71445300 | -1.80817700 |
| H  | -2.67255300 | -3.73702000 | -3.04816000 |
| H  | -1.06608700 | -3.14534500 | -3.45854700 |
| C  | -2.81938300 | -1.02811300 | -3.48786700 |
| H  | -3.74677000 | -1.52846800 | -3.79703800 |

|   |             |             |             |
|---|-------------|-------------|-------------|
| H | -3.06774900 | 0.01877700  | -3.27278600 |
| H | -2.13053000 | -1.04343200 | -4.34159600 |
| C | -4.89315300 | 0.88840000  | 2.84742400  |
| H | -4.77903800 | 1.82309500  | 3.40821600  |
| H | -5.86724100 | 0.91341500  | 2.34541900  |
| H | -4.90982800 | 0.07474300  | 3.58347600  |
| C | -2.42217300 | 0.62404300  | 2.63110700  |
| H | -2.30237600 | 1.46750600  | 3.32209600  |
| H | -2.40046300 | -0.30275800 | 3.21968400  |
| H | -1.54672000 | 0.60313000  | 1.96535300  |

## 2

| Atom | x           | y           | z           |
|------|-------------|-------------|-------------|
| C    | 1.02004000  | 2.55956900  | -1.18578600 |
| C    | 0.99586800  | 3.79269300  | -1.83346000 |
| C    | -0.23587700 | 4.32396200  | -2.20053300 |
| C    | -1.40050500 | 3.61042400  | -1.94295800 |
| C    | -1.29953100 | 2.38481100  | -1.28668200 |
| N    | -0.11172900 | 1.90342700  | -0.90852100 |
| H    | -0.28673000 | 5.28608000  | -2.70211200 |
| H    | 1.91551000  | 4.32606700  | -2.05626800 |
| H    | -2.36564300 | 4.00181100  | -2.25046200 |
| C    | 2.25406100  | 1.81812600  | -0.82308700 |
| C    | -2.44678100 | 1.49597400  | -0.97626100 |
| N    | -2.16871700 | 0.45138800  | -0.27508200 |
| N    | 2.06765800  | 0.70680300  | -0.19971100 |
| C    | -3.79143600 | 1.86592800  | -1.49957300 |
| H    | -3.74848900 | 2.06677500  | -2.57664500 |
| H    | -4.52512200 | 1.07833200  | -1.31383700 |
| H    | -4.14435300 | 2.78630700  | -1.01497200 |
| C    | 3.56735300  | 2.38257000  | -1.24052400 |
| H    | 3.74643500  | 3.32830500  | -0.71088900 |
| H    | 4.39083600  | 1.69966200  | -1.02093300 |
| H    | 3.57188200  | 2.61442500  | -2.31210800 |
| C    | -3.17614100 | -0.50075100 | 0.06977500  |
| C    | -3.19272800 | -1.72022100 | -0.63828600 |
| C    | -4.05472000 | -0.25125900 | 1.13926000  |
| C    | -4.10995100 | -2.69175700 | -0.24393300 |
| C    | -4.94050000 | -1.26917400 | 1.50329100  |
| C    | -4.97099600 | -2.47729600 | 0.82539100  |
| H    | -4.15000000 | -3.63684700 | -0.78128900 |
| C    | 3.14435500  | -0.20764300 | 0.02385400  |
| C    | 3.92026500  | -0.12484900 | 1.18966700  |
| C    | 3.31582400  | -1.24094200 | -0.91862300 |

|    |             |             |             |
|----|-------------|-------------|-------------|
| C  | 4.91549500  | -1.08667100 | 1.37870800  |
| C  | 4.32243100  | -2.17517400 | -0.67984900 |
| C  | 5.11988200  | -2.10115800 | 0.45561600  |
| H  | 5.53476600  | -1.04206500 | 2.27313300  |
| H  | 4.48423300  | -2.97931700 | -1.39509700 |
| H  | 5.89836000  | -2.84176100 | 0.62222000  |
| C  | 3.70077600  | 0.94594200  | 2.23806600  |
| H  | 2.77789900  | 1.48819500  | 1.98086200  |
| C  | 2.46656100  | -1.32221100 | -2.17438900 |
| H  | 1.52750200  | -0.77657500 | -1.98053800 |
| C  | -4.10305300 | 1.06532900  | 1.89198300  |
| H  | -3.37169700 | 1.75090600  | 1.44005100  |
| C  | -2.29550200 | -1.93899500 | -1.84109700 |
| H  | -1.39599700 | -1.31620300 | -1.70425600 |
| C  | 0.05975700  | -1.75220100 | 0.60454800  |
| H  | -0.96774700 | -2.12372000 | 0.75400700  |
| H  | 0.35011600  | -2.06967800 | -0.41600800 |
| C  | 0.97818000  | -2.44401400 | 1.59961700  |
| H  | 0.63335500  | -2.25067500 | 2.62818600  |
| H  | 1.99876200  | -2.03237300 | 1.54261100  |
| C  | 1.04871000  | -3.95194700 | 1.39581500  |
| H  | 0.05517900  | -4.41124900 | 1.49021200  |
| H  | 1.42973500  | -4.19877100 | 0.39457900  |
| H  | 1.70953100  | -4.43635300 | 2.12591300  |
| Co | -0.02757100 | 0.25035500  | 0.34033900  |
| C  | -0.07216600 | 0.36818300  | 2.44837600  |
| H  | 0.90560900  | 0.00972500  | 2.76738200  |
| H  | -0.91861000 | -0.24922200 | 2.74828100  |
| C  | -0.23236000 | 1.64656500  | 1.97953800  |
| H  | -1.22069800 | 2.09788000  | 1.89153800  |
| H  | 0.61507500  | 2.32894900  | 1.91487100  |
| C  | 4.84488500  | 1.95860800  | 2.25135200  |
| H  | 4.66527700  | 2.74132700  | 2.99886900  |
| H  | 5.79456300  | 1.47088000  | 2.50647800  |
| H  | 4.97683400  | 2.44311800  | 1.27623200  |
| C  | 3.51396000  | 0.34535900  | 3.63093500  |
| H  | 3.16458600  | 1.10932400  | 4.33640400  |
| H  | 2.79055600  | -0.48028600 | 3.63091900  |
| H  | 4.45754700  | -0.05187300 | 4.02537600  |
| C  | 3.17698600  | -0.64744500 | -3.34818000 |
| H  | 4.11875900  | -1.16652500 | -3.57102700 |
| H  | 2.55724300  | -0.67696200 | -4.25298100 |
| H  | 3.42510500  | 0.40048100  | -3.14075800 |
| C  | 2.08409000  | -2.74735100 | -2.55973200 |

|   |             |             |             |
|---|-------------|-------------|-------------|
| H | 1.62746700  | -3.29471100 | -1.72544200 |
| H | 1.36319400  | -2.72743900 | -3.38684400 |
| H | 2.94929600  | -3.32430600 | -2.90920600 |
| H | -5.67092700 | -3.25351700 | 1.12492800  |
| H | -5.62386300 | -1.10197200 | 2.33434400  |
| C | -1.83182200 | -3.38195200 | -2.00330800 |
| H | -1.39733300 | -3.77948900 | -1.07805200 |
| H | -2.65251000 | -4.04350100 | -2.30881500 |
| H | -1.06917900 | -3.44543900 | -2.78954100 |
| C | -2.99806300 | -1.47035800 | -3.11576000 |
| H | -3.91186000 | -2.05485000 | -3.28710600 |
| H | -3.29054000 | -0.41382300 | -3.06623800 |
| H | -2.34910000 | -1.60060800 | -3.99081000 |
| C | -5.47763700 | 1.72430700  | 1.77463800  |
| H | -5.46494300 | 2.72262900  | 2.22899700  |
| H | -5.80022200 | 1.82820600  | 0.73185300  |
| H | -6.24550600 | 1.14052500  | 2.29727900  |
| C | -3.73096300 | 0.89743800  | 3.36311000  |
| H | -3.74217700 | 1.86652300  | 3.87715900  |
| H | -4.44506500 | 0.24314700  | 3.87860000  |
| H | -2.73398800 | 0.45984800  | 3.49068100  |

### TS-2/3

| Atom | x           | y          | z          |
|------|-------------|------------|------------|
| C    | -0.99925900 | 2.70808600 | 0.94258200 |
| C    | -0.95977600 | 4.00773100 | 1.44055100 |
| C    | 0.27562600  | 4.56137500 | 1.76073900 |
| C    | 1.43457900  | 3.80619100 | 1.60222500 |
| C    | 1.32545800  | 2.51534500 | 1.09234200 |
| N    | 0.12932800  | 2.00383100 | 0.76562600 |
| H    | 0.33489200  | 5.57522800 | 2.14561400 |
| H    | -1.87407800 | 4.57752700 | 1.57862800 |
| H    | 2.40227700  | 4.21961000 | 1.87200500 |
| C    | -2.22382300 | 1.94170600 | 0.63440300 |
| C    | 2.45086200  | 1.57941400 | 0.88384100 |
| N    | 2.14819600  | 0.46893400 | 0.29489700 |
| N    | -2.03217400 | 0.80591000 | 0.04433700 |
| C    | 3.80507500  | 1.97402200 | 1.36207700 |
| H    | 3.76306300  | 2.31661400 | 2.40244100 |
| H    | 4.51544800  | 1.14744900 | 1.28907300 |
| H    | 4.18716400  | 2.81249100 | 0.76390600 |
| C    | -3.53717300 | 2.48310600 | 1.08159000 |
| H    | -3.69893000 | 3.48301800 | 0.65949400 |
| H    | -4.36610200 | 1.83796100 | 0.78220200 |

|    |             |             |             |
|----|-------------|-------------|-------------|
| H  | -3.55183900 | 2.59389700  | 2.17378600  |
| C  | 3.12748600  | -0.54224600 | 0.05987100  |
| C  | 3.07384300  | -1.69507500 | 0.87174800  |
| C  | 4.04545200  | -0.42703100 | -0.99981000 |
| C  | 3.97284500  | -2.72618400 | 0.60778300  |
| C  | 4.91340300  | -1.49837700 | -1.22838000 |
| C  | 4.88472500  | -2.63521500 | -0.43700800 |
| H  | 3.95926300  | -3.61929900 | 1.22851500  |
| C  | -3.09886300 | -0.13497000 | -0.09826900 |
| C  | -3.74935700 | -0.26554500 | -1.33777200 |
| C  | -3.39330200 | -0.97988700 | 0.98927500  |
| C  | -4.72373300 | -1.25544200 | -1.46541500 |
| C  | -4.36516900 | -1.96492000 | 0.80182300  |
| C  | -5.02703900 | -2.10563500 | -0.40969700 |
| H  | -5.24949400 | -1.36633800 | -2.41199000 |
| H  | -4.61021600 | -2.63023100 | 1.62865100  |
| H  | -5.78383100 | -2.87696800 | -0.53097800 |
| C  | -3.43486000 | 0.66196900  | -2.49236900 |
| H  | -2.43881000 | 1.08993300  | -2.30847400 |
| C  | -2.71806100 | -0.85066900 | 2.34354800  |
| H  | -1.95930300 | -0.05535500 | 2.28455900  |
| C  | 4.14184200  | 0.79545500  | -1.89196200 |
| H  | 3.39676500  | 1.53050300  | -1.55432100 |
| C  | 2.10821000  | -1.78325500 | 2.03787700  |
| H  | 1.21582700  | -1.18952100 | 1.77505500  |
| C  | -0.06377700 | -1.69870200 | -0.74018900 |
| H  | 0.95802800  | -2.09317000 | -0.66688000 |
| H  | -0.44381300 | -1.54349200 | 0.29651700  |
| C  | -0.98209300 | -2.67980100 | -1.43374100 |
| H  | -0.61716800 | -2.87025900 | -2.45411600 |
| H  | -1.98658800 | -2.24311800 | -1.53851200 |
| C  | -1.08325400 | -4.00594700 | -0.69328000 |
| H  | -0.09849200 | -4.47984000 | -0.58669600 |
| H  | -1.50564500 | -3.87680400 | 0.31207300  |
| H  | -1.73080200 | -4.70816900 | -1.23110800 |
| Co | 0.05462600  | 0.37539500  | -0.35757300 |
| C  | 0.14533200  | -0.36601100 | -2.33507800 |
| H  | -0.79992100 | -0.68510600 | -2.77377100 |
| H  | 0.98938100  | -0.98089000 | -2.65459800 |
| C  | 0.34863900  | 1.05009900  | -2.23446700 |
| H  | 1.35213800  | 1.45742700  | -2.35996900 |
| H  | -0.45524000 | 1.72140400  | -2.53923500 |
| C  | -4.43427600 | 1.81722300  | -2.54235300 |
| H  | -4.20046800 | 2.50177600  | -3.36710200 |

|   |             |             |             |
|---|-------------|-------------|-------------|
| H | -5.45246200 | 1.43761500  | -2.70102600 |
| H | -4.44064900 | 2.39803300  | -1.61144700 |
| C | -3.39078100 | -0.05061500 | -3.84045600 |
| H | -2.97662400 | 0.61636600  | -4.60628100 |
| H | -2.77358200 | -0.95780800 | -3.81124800 |
| H | -4.39258800 | -0.34365800 | -4.17960300 |
| C | -3.72723400 | -0.44982400 | 3.41917300  |
| H | -4.47179500 | -1.24090700 | 3.57450700  |
| H | -3.22517100 | -0.27884600 | 4.37929100  |
| H | -4.27260800 | 0.46329200  | 3.15096300  |
| C | -1.99106400 | -2.12901900 | 2.75552900  |
| H | -1.23237100 | -2.42535600 | 2.01979700  |
| H | -1.48841900 | -1.98542900 | 3.72109500  |
| H | -2.68560800 | -2.97123500 | 2.86951800  |
| H | 5.57388000  | -3.45343400 | -0.63150500 |
| H | 5.62944200  | -1.43089800 | -2.04609600 |
| C | 3.82807300  | 0.45840300  | -3.34857400 |
| H | 2.83957300  | -0.00383900 | -3.46103400 |
| H | 3.84741400  | 1.36534700  | -3.96575900 |
| H | 4.56870900  | -0.23653200 | -3.76388900 |
| C | 5.52026800  | 1.44940800  | -1.79444200 |
| H | 5.54570100  | 2.38242200  | -2.37063200 |
| H | 5.79802900  | 1.67984200  | -0.75889800 |
| H | 6.29849100  | 0.79283300  | -2.20356600 |
| C | 2.71974300  | -1.16025200 | 3.29268100  |
| H | 3.00035000  | -0.11049100 | 3.14219600  |
| H | 2.01409100  | -1.20279700 | 4.13214500  |
| H | 3.62635900  | -1.70543100 | 3.58712800  |
| C | 1.64789400  | -3.20466700 | 2.33683200  |
| H | 0.85077400  | -3.19438000 | 3.08978500  |
| H | 1.26382800  | -3.71202200 | 1.44268600  |
| H | 2.46059700  | -3.81680800 | 2.74819800  |

### 3

| Atom | x           | y           | z           |
|------|-------------|-------------|-------------|
| C    | -0.52658700 | -3.24091900 | 0.16464500  |
| C    | -0.33542200 | -4.61923900 | 0.12408500  |
| C    | 0.96832500  | -5.09677900 | 0.01995000  |
| C    | 2.03749000  | -4.21130400 | -0.07972300 |
| C    | 1.76765000  | -2.84651400 | -0.01450800 |
| N    | 0.51929200  | -2.41335200 | 0.16347800  |
| H    | 1.15034500  | -6.16719500 | -0.01271100 |
| H    | -1.17639700 | -5.30589200 | 0.15942900  |
| H    | 3.05033600  | -4.58110500 | -0.20753000 |

|   |             |             |             |
|---|-------------|-------------|-------------|
| C | -1.83788100 | -2.53836900 | 0.13016500  |
| C | 2.76190700  | -1.74939200 | -0.14913900 |
| N | 2.26222000  | -0.55821600 | -0.16639900 |
| N | -1.76030800 | -1.25826900 | -0.00889300 |
| C | 4.19582600  | -2.10589200 | -0.31610200 |
| H | 4.59508900  | -2.58281700 | 0.58851000  |
| H | 4.30011300  | -2.82960400 | -1.13441200 |
| H | 4.80215500  | -1.22749100 | -0.54732300 |
| C | -3.08774800 | -3.34153400 | 0.15012700  |
| H | -3.03114700 | -4.14163200 | -0.59897900 |
| H | -3.23181200 | -3.82532300 | 1.12581900  |
| H | -3.96100700 | -2.72502200 | -0.07249300 |
| C | 3.06409000  | 0.61534600  | -0.15971300 |
| C | 2.86558600  | 1.52786100  | -1.21686400 |
| C | 3.90800600  | 0.91427800  | 0.92873500  |
| C | 3.59828400  | 2.71069800  | -1.21049200 |
| C | 4.60456000  | 2.12427500  | 0.89070500  |
| C | 4.47088700  | 3.00507600  | -0.16991900 |
| H | 3.47822700  | 3.42326600  | -2.02215000 |
| C | -2.90118100 | -0.41286900 | -0.11757400 |
| C | -3.73653100 | -0.14449900 | 0.98192700  |
| C | -3.06348300 | 0.24285500  | -1.35711900 |
| C | -4.76782600 | 0.78006400  | 0.79404000  |
| C | -4.11351500 | 1.14613000  | -1.48923700 |
| C | -4.96180500 | 1.41524700  | -0.42135400 |
| H | -5.42901100 | 1.00784200  | 1.62834800  |
| H | -4.26609300 | 1.65997700  | -2.43495400 |
| H | -5.77267100 | 2.12990200  | -0.53889100 |
| C | -3.56801300 | -0.78191000 | 2.34882800  |
| H | -2.66425500 | -1.40858100 | 2.33569100  |
| C | -2.12103200 | -0.05628000 | -2.50505900 |
| H | -1.11226500 | -0.18263000 | -2.06958400 |
| C | 4.03215100  | 0.04595400  | 2.16720700  |
| H | 3.48010600  | -0.88920500 | 2.00577300  |
| C | 1.89125600  | 1.19812300  | -2.32590100 |
| H | 1.02867300  | 0.70194300  | -1.84323600 |
| C | -0.13261100 | 1.22948000  | 1.27834800  |
| H | -0.93323000 | 1.01410400  | 2.00372700  |
| H | 0.74152600  | 1.56597700  | 1.85407000  |
| C | -0.58188100 | 2.31619200  | 0.30544100  |
| H | -1.29030100 | 1.91518900  | -0.44343400 |
| H | 0.28799000  | 2.67463800  | -0.27076800 |
| C | -1.26105500 | 3.51251400  | 0.96185400  |
| H | -2.13604500 | 3.15841700  | 1.53327600  |

|    |             |             |             |
|----|-------------|-------------|-------------|
| H  | -0.57791800 | 3.96482700  | 1.69907200  |
| Co | 0.17500100  | -0.40942500 | 0.21452000  |
| C  | -1.70861100 | 4.56098400  | -0.04486800 |
| H  | -0.83664300 | 4.90044600  | -0.62624400 |
| H  | -2.39044100 | 4.08762500  | -0.77017300 |
| C  | -2.39087700 | 5.75107000  | 0.60514000  |
| H  | -2.71056300 | 6.49637400  | -0.13183300 |
| H  | -3.28069800 | 5.43713900  | 1.16604200  |
| H  | -1.71965300 | 6.25321900  | 1.31362500  |
| C  | -3.37847600 | 0.26348000  | 3.44770500  |
| H  | -4.27451300 | 0.88573300  | 3.56400100  |
| H  | -3.19693100 | -0.22817600 | 4.41097900  |
| H  | -2.53507700 | 0.93282200  | 3.24469100  |
| C  | -4.76327400 | -1.66966300 | 2.70027800  |
| H  | -5.67128200 | -1.06500800 | 2.82095700  |
| H  | -4.97458800 | -2.42239700 | 1.93370600  |
| H  | -4.59057300 | -2.18964900 | 3.65036400  |
| C  | -2.49408100 | -1.36361000 | -3.20450800 |
| H  | -3.50112800 | -1.28723200 | -3.63520500 |
| H  | -1.79561300 | -1.57816900 | -4.02299200 |
| H  | -2.48856000 | -2.22579800 | -2.52706300 |
| C  | -2.03468200 | 1.06083800  | -3.53432300 |
| H  | -1.25568300 | 0.82609500  | -4.27048600 |
| H  | -2.97283100 | 1.17162200  | -4.09304900 |
| H  | -1.79229500 | 2.02952300  | -3.07884900 |
| H  | 5.25823100  | 2.38147600  | 1.72236200  |
| H  | 5.03267900  | 3.93576700  | -0.17851200 |
| C  | 3.39146600  | 0.73039200  | 3.37369300  |
| H  | 2.33105000  | 0.94774000  | 3.19877000  |
| H  | 3.46467800  | 0.09076400  | 4.26182600  |
| H  | 3.89325600  | 1.67818100  | 3.60446200  |
| C  | 5.48335900  | -0.31771000 | 2.47530300  |
| H  | 5.99663700  | -0.75630100 | 1.61144200  |
| H  | 6.05799900  | 0.56429300  | 2.78389700  |
| H  | 5.53010000  | -1.03703900 | 3.30171200  |
| C  | 1.37507200  | 2.41984700  | -3.07158400 |
| H  | 0.60660500  | 2.12402000  | -3.79383200 |
| H  | 0.93615000  | 3.16429500  | -2.39499400 |
| H  | 2.17328300  | 2.90804200  | -3.64541200 |
| C  | 2.49253900  | 0.19943600  | -3.31473200 |
| H  | 3.34039800  | 0.65294200  | -3.84479800 |
| H  | 2.85900000  | -0.70869600 | -2.81982000 |
| H  | 1.74924700  | -0.10033100 | -4.06526200 |

## CHPh2

Doublet:

1

| Atom | x           | y           | z           |
|------|-------------|-------------|-------------|
| C    | -0.02164900 | 0.16397600  | 2.86407000  |
| C    | -0.03133000 | 0.30687000  | 4.24767300  |
| C    | 1.10638600  | -0.07815100 | 4.95463200  |
| C    | 2.22122000  | -0.57940700 | 4.28405500  |
| C    | 2.15311600  | -0.70126300 | 2.89983000  |
| N    | 1.04626500  | -0.34220200 | 2.24194800  |
| H    | 1.12976700  | 0.02492600  | 6.03558300  |
| H    | -0.89625700 | 0.71922300  | 4.75955200  |
| H    | 3.11736100  | -0.86194400 | 4.82927900  |
| C    | -1.05785600 | 0.58048200  | 1.89866200  |
| C    | 3.19852800  | -1.17014500 | 1.97118400  |
| N    | 2.84338500  | -1.18503400 | 0.71846200  |
| N    | -0.77887600 | 0.29863900  | 0.65585200  |
| C    | 4.53513500  | -1.51151100 | 2.52112900  |
| H    | 4.96661900  | -0.62523700 | 3.00587000  |
| H    | 4.44129300  | -2.28022600 | 3.29902000  |
| H    | 5.22781100  | -1.86176500 | 1.75397700  |
| C    | -2.23602500 | 1.31690900  | 2.41683700  |
| H    | -2.79752000 | 0.67602500  | 3.11039400  |
| H    | -1.88649400 | 2.19266900  | 2.98065400  |
| H    | -2.90926200 | 1.65235500  | 1.62724300  |
| C    | 3.80841100  | -1.56277100 | -0.27925800 |
| C    | 3.84860000  | -2.89144800 | -0.73472400 |
| C    | 4.65040300  | -0.56204900 | -0.80333500 |
| C    | 4.71876100  | -3.18802500 | -1.78609900 |
| C    | 5.49241500  | -0.91408600 | -1.85752300 |
| C    | 5.51851400  | -2.20988800 | -2.35653800 |
| H    | 4.77267900  | -4.20841200 | -2.15928900 |
| H    | 6.14957000  | -0.16401400 | -2.29123600 |
| H    | 6.18026000  | -2.46090900 | -3.18194500 |
| C    | -1.67948300 | 0.77066800  | -0.35529200 |
| C    | -1.37421200 | 1.99708700  | -0.96608900 |
| C    | -2.79820500 | 0.01316100  | -0.72637300 |
| C    | -2.27134600 | 2.51320000  | -1.89747700 |
| C    | -3.67913100 | 0.57418700  | -1.65410100 |
| C    | -3.43289900 | 1.81946300  | -2.21743700 |
| H    | -2.04412500 | 3.46027200  | -2.38440500 |
| C    | -0.07397800 | 2.69318100  | -0.60225400 |
| H    | 0.64565200  | 1.86916700  | -0.44980100 |

|    |             |             |             |
|----|-------------|-------------|-------------|
| C  | -3.01666900 | -1.37552800 | -0.14138700 |
| H  | -2.00889000 | -1.79035900 | 0.02860700  |
| C  | 4.63981600  | 0.85472600  | -0.25545100 |
| H  | 4.46025100  | 0.79651800  | 0.83064600  |
| C  | 3.06020100  | -4.00376900 | -0.06933200 |
| H  | 2.19408000  | -3.55094800 | 0.43834500  |
| C  | 0.89253000  | -0.81892100 | -1.54633700 |
| H  | 0.20740600  | -0.11907800 | -2.05521000 |
| H  | 1.87976400  | -0.72819500 | -2.03235300 |
| C  | 0.37154600  | -2.23647800 | -1.74007300 |
| H  | -0.66223900 | -2.32181300 | -1.36982700 |
| H  | 0.95703400  | -2.94538100 | -1.13569800 |
| C  | 0.40326800  | -2.69655700 | -3.19178300 |
| H  | -0.17552000 | -2.01471500 | -3.83041700 |
| H  | 1.43194800  | -2.70094600 | -3.57834400 |
| H  | -0.01208200 | -3.70539700 | -3.31818600 |
| Co | 0.99952600  | -0.51086300 | 0.35626700  |
| C  | 3.91297300  | -4.70012200 | 0.99308000  |
| H  | 4.25663200  | -4.01529200 | 1.77602900  |
| H  | 3.34858600  | -5.50794900 | 1.47523300  |
| H  | 4.80432000  | -5.14586600 | 0.53180700  |
| C  | 2.53783300  | -5.05293500 | -1.04823500 |
| H  | 3.34398500  | -5.70430000 | -1.40818100 |
| H  | 1.80912600  | -5.70158400 | -0.54775500 |
| H  | 2.05141600  | -4.60903900 | -1.92391200 |
| C  | 5.95925200  | 1.59044300  | -0.44928100 |
| H  | 6.13802600  | 1.83512800  | -1.50387500 |
| H  | 5.93972800  | 2.54051000  | 0.09693600  |
| H  | 6.81488700  | 1.00845500  | -0.08710800 |
| C  | 3.49587700  | 1.66124900  | -0.86361800 |
| H  | 3.48678400  | 2.69241000  | -0.48654000 |
| H  | 3.58453900  | 1.70276000  | -1.95749100 |
| H  | 2.52651600  | 1.20009800  | -0.63398500 |
| C  | 0.47691600  | 3.53768800  | -1.73985400 |
| C  | 0.92186100  | 2.88546000  | -2.89617600 |
| C  | 0.55753100  | 4.92850600  | -1.68611800 |
| C  | 1.43080100  | 3.60370400  | -3.96938900 |
| H  | 0.86608900  | 1.79772800  | -2.94914500 |
| C  | 1.06535900  | 5.65145900  | -2.76478900 |
| H  | 0.22805800  | 5.45880700  | -0.79488000 |
| C  | 1.50303400  | 4.99411100  | -3.90733000 |
| H  | 1.77210100  | 3.07733900  | -4.85811500 |
| H  | 1.11944900  | 6.73620200  | -2.70468600 |
| H  | 1.90075300  | 5.55964000  | -4.74678200 |

|   |             |             |             |
|---|-------------|-------------|-------------|
| C | -0.15693900 | 3.43314800  | 0.71794400  |
| C | 0.90311100  | 3.35539800  | 1.62567600  |
| C | -1.26303600 | 4.21912900  | 1.04791200  |
| C | 0.85137700  | 4.02653200  | 2.84378500  |
| H | 1.78560400  | 2.76549300  | 1.36525000  |
| C | -1.31284200 | 4.90383600  | 2.25845300  |
| H | -2.09615600 | 4.28850700  | 0.34830000  |
| C | -0.25997800 | 4.80149500  | 3.16469900  |
| H | 1.68438800  | 3.95241400  | 3.54008300  |
| H | -2.17993700 | 5.51528900  | 2.49814600  |
| H | -0.30116000 | 5.33270900  | 4.11276700  |
| C | -3.67588600 | -1.33293000 | 1.22230200  |
| C | -4.86310300 | -0.62860600 | 1.43446200  |
| C | -3.10677900 | -2.02431500 | 2.29324400  |
| C | -5.45814300 | -0.60314200 | 2.69086200  |
| H | -5.32139500 | -0.09177600 | 0.60409600  |
| C | -3.69349800 | -1.99429700 | 3.55640300  |
| H | -2.18961600 | -2.59415900 | 2.13181100  |
| C | -4.87104800 | -1.28027200 | 3.75844800  |
| H | -6.38449000 | -0.05273400 | 2.83927800  |
| H | -3.23400300 | -2.53652400 | 4.38031400  |
| H | -5.33580300 | -1.25753500 | 4.74138500  |
| C | -3.69032300 | -2.32979700 | -1.12036700 |
| C | -3.17879400 | -2.43831400 | -2.41993200 |
| C | -4.75505000 | -3.15482500 | -0.75848700 |
| C | -3.70940200 | -3.34467300 | -3.32710300 |
| H | -2.35477100 | -1.79386000 | -2.72531700 |
| C | -5.29414600 | -4.06095900 | -1.67044000 |
| H | -5.17062000 | -3.09909100 | 0.24537300  |
| C | -4.77473300 | -4.16173200 | -2.95445400 |
| H | -3.28915300 | -3.41228700 | -4.32866500 |
| H | -6.12740800 | -4.69174400 | -1.36837800 |
| H | -5.19591000 | -4.87108800 | -3.66311000 |
| H | -4.55609800 | 0.00503000  | -1.95749900 |
| H | -4.13445000 | 2.23615000  | -2.93590200 |

## 2

| Atom | x           | y           | z          |
|------|-------------|-------------|------------|
| C    | 1.99839900  | -0.78479100 | 2.98885500 |
| C    | 2.04281500  | -0.59073300 | 4.36661800 |
| C    | 0.91686600  | -0.06952500 | 4.99827700 |
| C    | -0.20517200 | 0.27780800  | 4.25136900 |
| C    | -0.18183100 | 0.05530600  | 2.87713400 |
| N    | 0.88690500  | -0.50185500 | 2.29488700 |

|   |             |             |             |
|---|-------------|-------------|-------------|
| H | 0.92348200  | 0.09100800  | 6.07239100  |
| H | 2.93684900  | -0.83187600 | 4.93503800  |
| H | -1.07221900 | 0.72577800  | 4.72796900  |
| C | 3.10259900  | -1.19488500 | 2.10793200  |
| C | -1.19749800 | 0.46556900  | 1.89305400  |
| N | -0.89637600 | 0.18864800  | 0.65679500  |
| N | 2.80684000  | -1.19943200 | 0.84094400  |
| C | -2.39542300 | 1.19380700  | 2.38522800  |
| H | -2.08051800 | 2.06462700  | 2.97497300  |
| H | -3.04387900 | 1.53270700  | 1.57621500  |
| H | -2.97847900 | 0.53686300  | 3.04476500  |
| C | 4.43219700  | -1.48795700 | 2.70675400  |
| H | 4.38086500  | -2.42680400 | 3.27490700  |
| H | 5.21314100  | -1.58019400 | 1.94966400  |
| H | 4.72051700  | -0.70338600 | 3.41618100  |
| C | -1.74723300 | 0.71676300  | -0.36952500 |
| C | -1.38118400 | 1.95210500  | -0.93613700 |
| C | -2.87595700 | 0.01104400  | -0.80773700 |
| C | -2.22518800 | 2.51248400  | -1.89296600 |
| C | -3.67879900 | 0.60041400  | -1.78733600 |
| C | -3.37379600 | 1.84925300  | -2.30783800 |
| H | -1.96293000 | 3.47217200  | -2.33382800 |
| C | 3.86515200  | -1.35236000 | -0.11559700 |
| C | 4.33174200  | -2.62136800 | -0.49145800 |
| C | 4.36748100  | -0.16591900 | -0.68718900 |
| C | 5.33787900  | -2.68142100 | -1.45926300 |
| C | 5.36874400  | -0.28522700 | -1.64966600 |
| C | 5.85211300  | -1.52997100 | -2.03504800 |
| H | 5.71762200  | -3.65360100 | -1.77016800 |
| H | 5.77828400  | 0.61241500  | -2.10777300 |
| H | 6.63241000  | -1.60024300 | -2.78913900 |
| C | 3.77273400  | -3.90890200 | 0.08118500  |
| H | 2.92880400  | -3.65059500 | 0.73937100  |
| C | 3.87482100  | 1.20128100  | -0.24650500 |
| H | 2.82031300  | 1.08845600  | 0.05852900  |
| C | -3.23782400 | -1.34449300 | -0.22389500 |
| H | -2.30155600 | -1.78759400 | 0.14570100  |
| C | -0.09236400 | 2.63398900  | -0.50194200 |
| H | 0.63300000  | 1.82047000  | -0.32861100 |
| C | 1.00465500  | -0.57980600 | -1.52716300 |
| H | 0.01751000  | -0.23324500 | -1.87599800 |
| H | 1.65852500  | 0.31438100  | -1.49971800 |
| C | 1.56635200  | -1.53568400 | -2.56549500 |
| H | 0.85702000  | -2.35752700 | -2.74902900 |

|    |             |             |             |
|----|-------------|-------------|-------------|
| H  | 2.49378900  | -2.00605000 | -2.20890600 |
| C  | 1.86105700  | -0.84325800 | -3.89074000 |
| H  | 0.95811500  | -0.37759500 | -4.30904200 |
| H  | 2.61617100  | -0.05471600 | -3.76263100 |
| H  | 2.24627700  | -1.54731100 | -4.63865000 |
| Co | 0.85675800  | -0.85804700 | 0.41951300  |
| C  | 0.18935700  | -2.81726700 | -0.19177900 |
| H  | 1.04497200  | -3.29451400 | -0.66292900 |
| H  | -0.67549700 | -2.66788400 | -0.83758300 |
| C  | 0.08342900  | -2.77496000 | 1.16614400  |
| H  | -0.86341100 | -2.55757800 | 1.66090000  |
| H  | 0.86195000  | -3.19902000 | 1.80030300  |
| H  | -4.55127400 | 0.05742200  | -2.14716000 |
| H  | -4.01973400 | 2.29810900  | -3.05819400 |
| C  | -4.14412000 | -1.23695300 | 0.99050400  |
| C  | -5.21691300 | -0.34470000 | 1.04149900  |
| C  | -3.92310000 | -2.07755100 | 2.08413500  |
| C  | -6.03647500 | -0.28327400 | 2.16394900  |
| H  | -5.40909900 | 0.31745100  | 0.19827100  |
| C  | -4.73866100 | -2.01751300 | 3.21069000  |
| H  | -3.10841400 | -2.80270900 | 2.04095500  |
| C  | -5.79677500 | -1.11406800 | 3.25513300  |
| H  | -6.86744700 | 0.41828900  | 2.18636200  |
| H  | -4.55043300 | -2.68149000 | 4.05162100  |
| H  | -6.43701200 | -1.06418600 | 4.13275400  |
| C  | -3.75874400 | -2.30430700 | -1.28723400 |
| C  | -4.97425300 | -2.97616200 | -1.16913100 |
| C  | -2.96940500 | -2.54451600 | -2.41851900 |
| C  | -5.39021400 | -3.86809000 | -2.15670400 |
| H  | -5.60363600 | -2.80848800 | -0.29768300 |
| C  | -3.37938000 | -3.43606700 | -3.40025600 |
| H  | -2.02744300 | -2.00550200 | -2.53538600 |
| C  | -4.59651800 | -4.10258400 | -3.27179100 |
| H  | -6.34331800 | -4.38093900 | -2.04744500 |
| H  | -2.75038600 | -3.60959500 | -4.27050700 |
| H  | -4.92294600 | -4.79947700 | -4.04013900 |
| C  | 0.52009100  | 3.50283000  | -1.59334200 |
| C  | 0.79925700  | 2.91963100  | -2.83572200 |
| C  | 0.87646300  | 4.83555300  | -1.39058000 |
| C  | 1.42304200  | 3.64255800  | -3.84249900 |
| H  | 0.52729200  | 1.87819500  | -3.00507500 |
| C  | 1.50212500  | 5.56475100  | -2.40191900 |
| H  | 0.67467900  | 5.31429400  | -0.43443200 |
| C  | 1.78044300  | 4.97261800  | -3.62705100 |

|   |             |             |             |
|---|-------------|-------------|-------------|
| H | 1.63535400  | 3.16342100  | -4.79651500 |
| H | 1.77221100  | 6.60340100  | -2.22397200 |
| H | 2.27121200  | 5.54207700  | -4.41294500 |
| C | -0.22828000 | 3.34772000  | 0.82736600  |
| C | 0.78021400  | 3.21861200  | 1.78578700  |
| C | -1.31853100 | 4.17292500  | 1.10895400  |
| C | 0.69277500  | 3.87727000  | 3.00884900  |
| H | 1.64573800  | 2.58906300  | 1.56168100  |
| C | -1.40582800 | 4.84084000  | 2.32639900  |
| H | -2.10790900 | 4.28720300  | 0.36583600  |
| C | -0.40439000 | 4.68915500  | 3.28346000  |
| H | 1.48352500  | 3.75737700  | 3.74708200  |
| H | -2.26050900 | 5.48171100  | 2.53116700  |
| H | -0.47587100 | 5.20919900  | 4.23592800  |
| C | 4.81243800  | -4.65562100 | 0.91583800  |
| H | 4.38177800  | -5.57031000 | 1.34154600  |
| H | 5.66938800  | -4.95415900 | 0.29853000  |
| H | 5.20025900  | -4.04785500 | 1.74087100  |
| C | 3.24268700  | -4.82853100 | -1.01949100 |
| H | 2.69429700  | -5.67285200 | -0.58391000 |
| H | 2.57346500  | -4.30392900 | -1.71277300 |
| H | 4.06396800  | -5.24640000 | -1.61483600 |
| C | 4.65887400  | 1.71533300  | 0.96266700  |
| H | 5.73461500  | 1.73233900  | 0.74289200  |
| H | 4.35638900  | 2.74100000  | 1.21022600  |
| H | 4.51350600  | 1.10101300  | 1.85973200  |
| C | 3.92215500  | 2.24634300  | -1.35527300 |
| H | 3.46127700  | 1.88914300  | -2.28418000 |
| H | 3.38377300  | 3.15167100  | -1.04418900 |
| H | 4.95305700  | 2.54874100  | -1.58157000 |

### TS-2/3

| Atom | x           | y           | z          |
|------|-------------|-------------|------------|
| C    | 1.58485600  | -0.65191400 | 3.07979200 |
| C    | 1.55169000  | -0.35696600 | 4.43982200 |
| C    | 0.42803000  | 0.27437800  | 4.96406700 |
| C    | -0.62134300 | 0.63013200  | 4.12125300 |
| C    | -0.53592500 | 0.31026400  | 2.77042600 |
| N    | 0.53057100  | -0.35883600 | 2.28974900 |
| H    | 0.38214000  | 0.51384700  | 6.02231700 |
| H    | 2.39480000  | -0.60826100 | 5.07720700 |
| H    | -1.48569400 | 1.16532200  | 4.50393000 |
| C    | 2.71690800  | -1.18559200 | 2.32179500 |
| C    | -1.46070100 | 0.72771500  | 1.71345800 |

|   |             |             |             |
|---|-------------|-------------|-------------|
| N | -1.09238600 | 0.37929100  | 0.51229800  |
| N | 2.51844700  | -1.22519000 | 1.03414200  |
| C | -2.63267700 | 1.56622000  | 2.08128200  |
| H | -2.28558500 | 2.46287200  | 2.61179700  |
| H | -3.20871200 | 1.88158600  | 1.20981600  |
| H | -3.29866600 | 1.01443600  | 2.75742400  |
| C | 3.97602300  | -1.54207000 | 3.03180100  |
| H | 3.81824300  | -2.42505200 | 3.66527300  |
| H | 4.78869200  | -1.75373500 | 2.33313100  |
| H | 4.29211200  | -0.72568200 | 3.69277300  |
| C | -1.82744500 | 0.89095700  | -0.60197700 |
| C | -1.32585100 | 2.05030900  | -1.22318300 |
| C | -2.97019000 | 0.23814300  | -1.08898100 |
| C | -2.06138400 | 2.61532900  | -2.26340200 |
| C | -3.66300600 | 0.82654500  | -2.14923300 |
| C | -3.23408500 | 2.02014900  | -2.71224400 |
| H | -1.69198900 | 3.51965500  | -2.74297500 |
| C | 3.59295600  | -1.53503900 | 0.14112000  |
| C | 3.98683000  | -2.85895800 | -0.12235200 |
| C | 4.18899300  | -0.43780700 | -0.51914800 |
| C | 5.00803700  | -3.06132400 | -1.05522700 |
| C | 5.20295000  | -0.69830400 | -1.43900100 |
| C | 5.61219800  | -1.99881800 | -1.70848200 |
| H | 5.33002500  | -4.07865300 | -1.27202000 |
| H | 5.68237900  | 0.12996900  | -1.95577900 |
| H | 6.40425900  | -2.18139300 | -2.43076800 |
| C | 3.35464200  | -4.06587400 | 0.54314300  |
| H | 2.50034300  | -3.71780200 | 1.14225900  |
| C | 3.77436500  | 0.98759100  | -0.20350700 |
| H | 2.69325500  | 0.97365700  | 0.02241900  |
| C | -3.44443300 | -1.06822500 | -0.47556700 |
| H | -2.55371600 | -1.55329500 | -0.04893200 |
| C | 0.00334800  | 2.63123600  | -0.76481700 |
| H | 0.63843600  | 1.75736000  | -0.53293400 |
| C | 0.64701200  | -1.06297100 | -1.52952000 |
| H | -0.28920100 | -0.65286400 | -1.92966200 |
| H | 1.28913400  | -0.20147400 | -1.22793700 |
| C | 1.40710600  | -1.80055000 | -2.61650800 |
| H | 0.79813700  | -2.63535100 | -2.99499200 |
| H | 2.32160700  | -2.24222400 | -2.19446300 |
| C | 1.77599400  | -0.88267800 | -3.77164000 |
| H | 0.88397900  | -0.43773300 | -4.23336000 |
| H | 2.42773900  | -0.06195900 | -3.44067100 |
| H | 2.31247100  | -1.43284300 | -4.55240900 |

|    |             |             |             |
|----|-------------|-------------|-------------|
| Co | 0.57632300  | -0.84873500 | 0.51799100  |
| C  | 0.03505200  | -2.59301900 | -0.51212700 |
| H  | 0.84095500  | -3.26044700 | -0.81199800 |
| H  | -0.83529500 | -2.68240100 | -1.16741300 |
| C  | -0.23009000 | -2.57737600 | 0.90372200  |
| H  | -1.26575000 | -2.51553800 | 1.24486300  |
| H  | 0.39756000  | -3.20291400 | 1.54302000  |
| H  | -4.54608100 | 0.32556800  | -2.54266700 |
| H  | -3.79641300 | 2.47197900  | -3.52551000 |
| C  | -4.39367900 | -0.85389900 | 0.68961800  |
| C  | -5.43606500 | 0.07390100  | 0.63560200  |
| C  | -4.25189600 | -1.63280700 | 1.83960900  |
| C  | -6.30649400 | 0.22611400  | 1.71001800  |
| H  | -5.56481400 | 0.68852600  | -0.25453700 |
| C  | -5.11783900 | -1.48130700 | 2.91891100  |
| H  | -3.45801000 | -2.37929600 | 1.88129700  |
| C  | -6.14761600 | -0.54705700 | 2.85733900  |
| H  | -7.11366600 | 0.95294800  | 1.65095300  |
| H  | -4.99165800 | -2.09833500 | 3.80589400  |
| H  | -6.82858500 | -0.42625000 | 3.69656400  |
| C  | -3.98088600 | -2.03921500 | -1.52240600 |
| C  | -5.22834300 | -2.65121100 | -1.41096500 |
| C  | -3.17713000 | -2.36441800 | -2.62322300 |
| C  | -5.66081800 | -3.56587300 | -2.36993600 |
| H  | -5.87272400 | -2.41975000 | -0.56545600 |
| C  | -3.60407600 | -3.27819900 | -3.57723300 |
| H  | -2.20756000 | -1.87597100 | -2.74282400 |
| C  | -4.85253100 | -3.88451900 | -3.45315800 |
| H  | -6.63861200 | -4.03041400 | -2.26337600 |
| H  | -2.96323900 | -3.51567600 | -4.42363900 |
| H  | -5.19136200 | -4.59883100 | -4.19974600 |
| C  | 0.73212200  | 3.38249500  | -1.86989500 |
| C  | 1.02369900  | 2.69711400  | -3.05511400 |
| C  | 1.17372700  | 4.69795900  | -1.73858900 |
| C  | 1.73834900  | 3.30250100  | -4.07849600 |
| H  | 0.68288500  | 1.66776000  | -3.17138800 |
| C  | 1.89291300  | 5.30985500  | -2.76569300 |
| H  | 0.96691400  | 5.25302500  | -0.82585900 |
| C  | 2.17963400  | 4.61703200  | -3.93503100 |
| H  | 1.95722600  | 2.74437300  | -4.98723400 |
| H  | 2.23061200  | 6.33675800  | -2.64446200 |
| H  | 2.74216800  | 5.09663400  | -4.73258200 |
| C  | -0.10209000 | 3.41064100  | 0.53003300  |
| C  | 0.84554600  | 3.20849900  | 1.53642900  |

|   |             |             |             |
|---|-------------|-------------|-------------|
| C | -1.10301600 | 4.36282400  | 0.73299300  |
| C | 0.78914900  | 3.92728500  | 2.72681300  |
| H | 1.63667600  | 2.47024000  | 1.38217300  |
| C | -1.15729900 | 5.09128400  | 1.91787800  |
| H | -1.84557200 | 4.53292000  | -0.04686300 |
| C | -0.21578400 | 4.87106600  | 2.92099800  |
| H | 1.53198700  | 3.74958100  | 3.50230100  |
| H | -1.93982300 | 5.83350500  | 2.05945400  |
| H | -0.26142900 | 5.43906700  | 3.84728500  |
| C | 4.33660000  | -4.76853300 | 1.48131800  |
| H | 3.85243600  | -5.61710400 | 1.98013400  |
| H | 5.19403000  | -5.16298600 | 0.92127600  |
| H | 4.73056000  | -4.10046400 | 2.25503500  |
| C | 2.83475900  | -5.07610700 | -0.48137200 |
| H | 2.21195700  | -5.83399800 | 0.00912800  |
| H | 2.24028700  | -4.60797400 | -1.27557700 |
| H | 3.66246500  | -5.60477700 | -0.97087600 |
| C | 4.49502000  | 1.51053600  | 1.04047300  |
| H | 5.58268200  | 1.46849700  | 0.89477300  |
| H | 4.22564900  | 2.55725500  | 1.23226400  |
| H | 4.25809500  | 0.93284900  | 1.94230400  |
| C | 3.99257300  | 1.95900500  | -1.35613700 |
| H | 3.57784500  | 1.58651600  | -2.30099700 |
| H | 3.50687300  | 2.91871700  | -1.13619000 |
| H | 5.05907500  | 2.16632400  | -1.51333400 |

### 3

| Atom | x           | y           | z          |
|------|-------------|-------------|------------|
| C    | 1.07029800  | -1.09801100 | 3.51099300 |
| C    | 0.67475400  | -1.30682500 | 4.82866300 |
| C    | -0.59937300 | -0.88397400 | 5.20737000 |
| C    | -1.45543300 | -0.28349900 | 4.28425500 |
| C    | -0.99546700 | -0.10982000 | 2.98366900 |
| N    | 0.24160000  | -0.49368900 | 2.64903800 |
| H    | -0.93342900 | -1.03684300 | 6.22962000 |
| H    | 1.33316100  | -1.79519200 | 5.54167100 |
| H    | -2.45798000 | 0.02617700  | 4.56638700 |
| C    | 2.33160100  | -1.47600000 | 2.84786900 |
| C    | -1.71341500 | 0.44276300  | 1.81805700 |
| N    | -1.07386800 | 0.29520700  | 0.69090900 |
| N    | 2.34337800  | -1.25766100 | 1.56267800 |
| C    | -3.02124100 | 1.10043700  | 2.03374400 |
| H    | -3.73476900 | 0.38138300  | 2.45792000 |
| H    | -2.89600300 | 1.91298300  | 2.76228100 |

|    |             |             |             |
|----|-------------|-------------|-------------|
| H  | -3.43919800 | 1.50791200  | 1.11263200  |
| C  | 3.44455400  | -2.03735600 | 3.65277900  |
| H  | 3.56539600  | -1.47083400 | 4.58354200  |
| H  | 3.21551800  | -3.07431100 | 3.93585400  |
| H  | 4.38972000  | -2.03010900 | 3.10522000  |
| C  | -1.61623000 | 0.80554900  | -0.53028400 |
| C  | -1.17972000 | 2.06783200  | -0.96727000 |
| C  | -2.45102500 | -0.01047400 | -1.31126700 |
| C  | -1.67819900 | 2.54804400  | -2.17720400 |
| C  | -2.91869400 | 0.50950500  | -2.51860300 |
| C  | -2.55496300 | 1.78287600  | -2.93671500 |
| H  | -1.35031200 | 3.52079300  | -2.53921200 |
| C  | 3.53459900  | -1.49444900 | 0.80006300  |
| C  | 3.87539900  | -2.78665100 | 0.37264800  |
| C  | 4.28256900  | -0.35850100 | 0.43097600  |
| C  | 5.02328500  | -2.92249900 | -0.41394600 |
| C  | 5.42250300  | -0.55302800 | -0.34573000 |
| C  | 5.79429700  | -1.82575000 | -0.76400700 |
| H  | 5.31241700  | -3.91445300 | -0.75742800 |
| H  | 6.02440900  | 0.30305100  | -0.64092600 |
| H  | 6.68497300  | -1.95826900 | -1.37328700 |
| C  | 3.06382300  | -4.02138900 | 0.71181300  |
| H  | 2.18221300  | -3.70964000 | 1.29183700  |
| C  | 3.84378000  | 1.02727100  | 0.86628600  |
| H  | 2.73833500  | 1.04539200  | 0.77808300  |
| C  | -2.77677000 | -1.42879700 | -0.85602000 |
| H  | -1.84831300 | -1.81540900 | -0.40508000 |
| C  | -0.14152500 | 2.82689400  | -0.14721500 |
| H  | 0.60659700  | 2.06322900  | 0.14776900  |
| C  | 0.95297800  | -1.08639600 | -1.01096700 |
| H  | 1.44025100  | -2.07320400 | -0.92198000 |
| H  | -0.03219500 | -1.24886000 | -1.47090600 |
| C  | 1.76916300  | -0.22029300 | -1.95521900 |
| H  | 2.66265800  | 0.18492800  | -1.44984000 |
| H  | 1.16187200  | 0.64720400  | -2.26083500 |
| C  | 2.24959000  | -0.93348100 | -3.21249200 |
| H  | 2.87533500  | -1.79579600 | -2.92177000 |
| H  | 1.38486900  | -1.35114100 | -3.75527100 |
| Co | 0.69845100  | -0.49945700 | 0.82993900  |
| C  | 3.04355200  | -0.01557400 | -4.13021500 |
| H  | 2.41907500  | 0.84956100  | -4.40543500 |
| H  | 3.89722600  | 0.39812700  | -3.56708600 |
| C  | 3.54265400  | -0.71378000 | -5.38246500 |
| H  | 4.12187200  | -0.04203800 | -6.02615000 |

|   |             |             |             |
|---|-------------|-------------|-------------|
| H | 4.18623100  | -1.56635700 | -5.12911400 |
| H | 2.70607400  | -1.10196300 | -5.97758200 |
| H | -3.55684200 | -0.10770600 | -3.14798800 |
| H | -2.93149700 | 2.16989700  | -3.88040900 |
| C | -3.82940600 | -1.47573100 | 0.23502700  |
| C | -4.99849300 | -0.71477400 | 0.16417300  |
| C | -3.64563100 | -2.31903800 | 1.33339800  |
| C | -5.96473000 | -0.80228300 | 1.16138900  |
| H | -5.14395800 | -0.03466700 | -0.67533400 |
| C | -4.60209500 | -2.39848600 | 2.34154900  |
| H | -2.73827600 | -2.92309400 | 1.39007500  |
| C | -5.76759500 | -1.64072100 | 2.25587900  |
| H | -6.87259800 | -0.20767000 | 1.08850300  |
| H | -4.44049400 | -3.05964900 | 3.19038100  |
| H | -6.52182900 | -1.70711600 | 3.03660500  |
| C | -3.09662300 | -2.36410800 | -2.01583500 |
| C | -2.04592600 | -3.00221300 | -2.68139000 |
| C | -4.40028300 | -2.59551200 | -2.45924900 |
| C | -2.28773900 | -3.83957600 | -3.76421300 |
| H | -1.02178000 | -2.84300000 | -2.34258800 |
| C | -4.64503000 | -3.43080700 | -3.54563400 |
| H | -5.23887000 | -2.12711300 | -1.94734600 |
| C | -3.59076300 | -4.05539000 | -4.20244200 |
| H | -1.45478100 | -4.32860600 | -4.26465200 |
| H | -5.66840700 | -3.59740200 | -3.87472200 |
| H | -3.78380400 | -4.71129900 | -5.04811200 |
| C | -0.69604800 | 3.39449100  | 1.14512600  |
| C | 0.03876100  | 3.27242900  | 2.32670500  |
| C | -1.91858800 | 4.06887800  | 1.18635900  |
| C | -0.43522400 | 3.80139900  | 3.52314800  |
| H | 0.99895800  | 2.75134000  | 2.30258600  |
| C | -2.38878700 | 4.61576700  | 2.37673300  |
| H | -2.51120100 | 4.15628400  | 0.27532600  |
| C | -1.65223500 | 4.47821900  | 3.55040300  |
| H | 0.14944700  | 3.69238100  | 4.43405700  |
| H | -3.33846600 | 5.14600100  | 2.38863800  |
| H | -2.02280900 | 4.90022000  | 4.48161700  |
| C | 0.60847200  | 3.86967000  | -0.96414200 |
| C | 0.22698300  | 5.21190100  | -1.00976600 |
| C | 1.70298400  | 3.46554300  | -1.73187800 |
| C | 0.91960100  | 6.12010000  | -1.80630600 |
| H | -0.61333800 | 5.55950600  | -0.41216900 |
| C | 2.40027400  | 4.36994000  | -2.52391100 |
| H | 2.01658300  | 2.42326200  | -1.70367600 |

|   |            |             |             |
|---|------------|-------------|-------------|
| C | 2.00803100 | 5.70429400  | -2.56560400 |
| H | 0.60721100 | 7.16179400  | -1.82630000 |
| H | 3.25490000 | 4.02853900  | -3.10561700 |
| H | 2.55030600 | 6.41724800  | -3.18216700 |
| C | 2.55984500 | -4.73043800 | -0.54532100 |
| H | 3.39301600 | -5.11463100 | -1.14695400 |
| H | 1.93131300 | -5.58749400 | -0.27442000 |
| H | 1.96904600 | -4.06545100 | -1.18706700 |
| C | 3.87527600 | -4.99906300 | 1.56286100  |
| H | 4.72962200 | -5.39101200 | 0.99667600  |
| H | 4.27496800 | -4.53337600 | 2.47196000  |
| H | 3.26036700 | -5.85707000 | 1.86076800  |
| C | 4.20987600 | 1.31441600  | 2.32348200  |
| H | 5.28863700 | 1.17817800  | 2.47625200  |
| H | 3.96841900 | 2.35180700  | 2.58616900  |
| H | 3.68893200 | 0.66173800  | 3.03441800  |
| C | 4.38908900 | 2.14430900  | -0.01313700 |
| H | 3.89749800 | 3.09144100  | 0.24015300  |
| H | 5.46633900 | 2.28553700  | 0.14409200  |
| H | 4.22270000 | 1.95531200  | -1.08133300 |

#### Quartet:

1

| Atom | x           | y           | z          |
|------|-------------|-------------|------------|
| C    | -0.00184300 | 0.17396100  | 2.83835700 |
| C    | -0.04087300 | 0.25638200  | 4.22778500 |
| C    | 1.08846800  | -0.13211500 | 4.94038300 |
| C    | 2.21811300  | -0.58276800 | 4.26410900 |
| C    | 2.17409200  | -0.64743300 | 2.87416100 |
| N    | 1.08406200  | -0.26955900 | 2.20279500 |
| H    | 1.09123900  | -0.07859300 | 6.02532000 |
| H    | -0.92767900 | 0.61710000  | 4.74097000 |
| H    | 3.10775900  | -0.88042400 | 4.81100700 |
| C    | -1.09291100 | 0.60934600  | 1.92604700 |
| C    | 3.28660400  | -1.11237300 | 2.00271900 |
| N    | 2.97590900  | -1.25974700 | 0.76354400 |
| N    | -0.90477800 | 0.31987100  | 0.68457700 |
| C    | 4.62556600  | -1.33422300 | 2.61337100 |
| H    | 5.00520300  | -0.39703700 | 3.04101900 |
| H    | 4.55950400  | -2.05452900 | 3.43812600 |
| H    | 5.34755700  | -1.70428200 | 1.88199200 |
| C    | -2.23738400 | 1.35287600  | 2.50979400 |
| H    | -2.77596200 | 0.70585600  | 3.21603600 |

|    |             |             |             |
|----|-------------|-------------|-------------|
| H  | -1.86844300 | 2.22474500  | 3.06552800  |
| H  | -2.93896700 | 1.69096400  | 1.74544400  |
| C  | 3.93394500  | -1.63056300 | -0.22844600 |
| C  | 3.92044300  | -2.95146700 | -0.71247800 |
| C  | 4.77168900  | -0.63857300 | -0.77370500 |
| C  | 4.75491400  | -3.25801700 | -1.78688700 |
| C  | 5.58254400  | -1.00098900 | -1.85019800 |
| C  | 5.57073200  | -2.29207500 | -2.35961400 |
| H  | 4.76764200  | -4.27189900 | -2.18009700 |
| H  | 6.23804800  | -0.25797100 | -2.29909600 |
| H  | 6.20766100  | -2.54912300 | -3.20255300 |
| C  | -1.79529900 | 0.81482200  | -0.31245900 |
| C  | -1.46990800 | 2.03841000  | -0.91989900 |
| C  | -2.89693400 | 0.05179400  | -0.71743500 |
| C  | -2.35027300 | 2.55491600  | -1.86736800 |
| C  | -3.76121100 | 0.61146200  | -1.66024700 |
| C  | -3.50596100 | 1.86131600  | -2.21081400 |
| H  | -2.11236700 | 3.49996800  | -2.35312200 |
| C  | -0.15802000 | 2.71583500  | -0.55343700 |
| H  | 0.55288700  | 1.88138200  | -0.39937500 |
| C  | -3.08590200 | -1.34699200 | -0.14963200 |
| H  | -2.06603700 | -1.74650900 | -0.00877200 |
| C  | 4.75713500  | 0.79030400  | -0.26137500 |
| H  | 4.54479400  | 0.76723500  | 0.81865700  |
| C  | 3.08874300  | -4.02429900 | -0.03905800 |
| H  | 2.17953600  | -3.54135000 | 0.35619000  |
| C  | 0.88398700  | -0.85947000 | -1.82700900 |
| H  | 0.15865000  | -0.19790000 | -2.33000600 |
| H  | 1.85629300  | -0.70686700 | -2.32564200 |
| C  | 0.44390000  | -2.31331800 | -1.99480900 |
| H  | -0.57035100 | -2.45731800 | -1.58494600 |
| H  | 1.09048000  | -2.98065500 | -1.40473100 |
| C  | 0.45975200  | -2.79030100 | -3.44036700 |
| H  | -0.15405000 | -2.13771600 | -4.07666900 |
| H  | 1.48324700  | -2.76573000 | -3.84052000 |
| H  | 0.07818800  | -3.81493100 | -3.54500400 |
| Co | 0.99339100  | -0.52394200 | 0.11655200  |
| C  | 3.84917900  | -4.62202900 | 1.14646300  |
| H  | 4.11299900  | -3.86960700 | 1.89857200  |
| H  | 3.25292800  | -5.39894000 | 1.64083300  |
| H  | 4.78396100  | -5.08494600 | 0.80346000  |
| C  | 2.65815900  | -5.14710700 | -0.97612200 |
| H  | 3.50300900  | -5.79610100 | -1.23973500 |
| H  | 1.91321500  | -5.78192400 | -0.48242600 |

|   |             |             |             |
|---|-------------|-------------|-------------|
| H | 2.21928700  | -4.77261700 | -1.90862300 |
| C | 6.08891100  | 1.50909600  | -0.43571600 |
| H | 6.29912800  | 1.72914700  | -1.48979500 |
| H | 6.06607000  | 2.47106700  | 0.08919700  |
| H | 6.92712500  | 0.92471400  | -0.03817100 |
| C | 3.63799800  | 1.58630700  | -0.93144200 |
| H | 3.62801800  | 2.62850000  | -0.58671000 |
| H | 3.76933000  | 1.59362800  | -2.02200400 |
| H | 2.65313900  | 1.14121700  | -0.72794800 |
| C | 0.40659200  | 3.55039600  | -1.69197000 |
| C | 0.86762300  | 2.88921900  | -2.83643300 |
| C | 0.47935500  | 4.94212400  | -1.65053000 |
| C | 1.38795400  | 3.59965300  | -3.90957700 |
| H | 0.81485800  | 1.80090600  | -2.88185300 |
| C | 0.99809400  | 5.65699300  | -2.72918700 |
| H | 0.13645000  | 5.47873200  | -0.76809900 |
| C | 1.45401900  | 4.99062800  | -3.85952900 |
| H | 1.74268400  | 3.06639800  | -4.78889400 |
| H | 1.04700600  | 6.74247200  | -2.67878500 |
| H | 1.86143900  | 5.54983300  | -4.69857000 |
| C | -0.22361000 | 3.46162800  | 0.76358500  |
| C | 0.85596500  | 3.39644300  | 1.64855700  |
| C | -1.32738000 | 4.24295600  | 1.11104100  |
| C | 0.82697500  | 4.07632300  | 2.86225800  |
| H | 1.73592100  | 2.81094000  | 1.37190500  |
| C | -1.35408500 | 4.93778300  | 2.31666500  |
| H | -2.17602800 | 4.30117700  | 0.42945100  |
| C | -0.28120500 | 4.84866800  | 3.20038100  |
| H | 1.67375400  | 4.00945500  | 3.54242100  |
| H | -2.21895500 | 5.54690900  | 2.56994200  |
| H | -0.30467200 | 5.38775000  | 4.14459600  |
| C | -3.71122400 | -1.32269400 | 1.23034300  |
| C | -4.89765800 | -0.62694700 | 1.47541600  |
| C | -3.10809900 | -2.01037100 | 2.28469200  |
| C | -5.45925600 | -0.60845500 | 2.74728700  |
| H | -5.38106400 | -0.09190000 | 0.65802100  |
| C | -3.66063000 | -1.98614000 | 3.56315600  |
| H | -2.19031100 | -2.57124700 | 2.09763400  |
| C | -4.83833200 | -1.28183800 | 3.79764700  |
| H | -6.38528800 | -0.06499600 | 2.92149300  |
| H | -3.17414600 | -2.52446800 | 4.37424300  |
| H | -5.27652100 | -1.26354200 | 4.79285200  |
| C | -3.76559500 | -2.29664300 | -1.12677600 |
| C | -3.23477100 | -2.42473700 | -2.41697900 |

|   |             |             |             |
|---|-------------|-------------|-------------|
| C | -4.85656400 | -3.09139800 | -0.77807900 |
| C | -3.77308900 | -3.32191400 | -3.32843900 |
| H | -2.39013200 | -1.80102200 | -2.71051900 |
| C | -5.40300100 | -3.98913500 | -1.69436100 |
| H | -5.28629200 | -3.01954100 | 0.21877400  |
| C | -4.86488500 | -4.10992700 | -2.96873200 |
| H | -3.33908700 | -3.40585400 | -4.32280000 |
| H | -6.25635500 | -4.59776000 | -1.40301100 |
| H | -5.29150300 | -4.81300400 | -3.68037200 |
| H | -4.62848600 | 0.03969600  | -1.98574400 |
| H | -4.19272600 | 2.27991500  | -2.94228500 |

## 2

| Atom | x           | y           | z           |
|------|-------------|-------------|-------------|
| C    | 1.96043300  | -0.71661500 | 3.00108300  |
| C    | 1.95812400  | -0.59835100 | 4.38867300  |
| C    | 0.79879200  | -0.14517700 | 5.01050600  |
| C    | -0.30586100 | 0.20608600  | 4.24316900  |
| C    | -0.22404500 | 0.06492800  | 2.85837500  |
| N    | 0.88042000  | -0.40659500 | 2.27850800  |
| H    | 0.76258600  | -0.04837100 | 6.09177000  |
| H    | 2.83845900  | -0.85281100 | 4.97222400  |
| H    | -1.20485200 | 0.59339700  | 4.71310700  |
| C    | 3.13325300  | -1.10262600 | 2.17811900  |
| C    | -1.26597000 | 0.49724900  | 1.89313700  |
| N    | -1.03094900 | 0.19711600  | 0.66042200  |
| N    | 2.90302600  | -1.18927700 | 0.91487600  |
| C    | -2.41999000 | 1.27578700  | 2.41838800  |
| H    | -2.05678200 | 2.16231200  | 2.95508300  |
| H    | -3.09511900 | 1.59827700  | 1.62380700  |
| H    | -2.99169000 | 0.66272800  | 3.12804000  |
| C    | 4.44715200  | -1.29597000 | 2.85203900  |
| H    | 4.42360400  | -2.22083200 | 3.44471000  |
| H    | 5.26649600  | -1.36621700 | 2.13286600  |
| H    | 4.65541000  | -0.47676400 | 3.54985100  |
| C    | -1.86785400 | 0.74594000  | -0.35958100 |
| C    | -1.47989900 | 1.97422300  | -0.92720100 |
| C    | -2.99706500 | 0.04896000  | -0.80796200 |
| C    | -2.32635100 | 2.55319400  | -1.87075400 |
| C    | -3.80543800 | 0.65759400  | -1.77026800 |
| C    | -3.49223300 | 1.91190400  | -2.27430000 |
| H    | -2.05021000 | 3.50693300  | -2.31620700 |
| C    | 3.96947200  | -1.33914500 | -0.02462500 |
| C    | 4.44170500  | -2.60875000 | -0.38646200 |

|    |             |             |             |
|----|-------------|-------------|-------------|
| C  | 4.44576700  | -0.15768100 | -0.62766500 |
| C  | 5.45658100  | -2.67325000 | -1.34520200 |
| C  | 5.45836200  | -0.27919200 | -1.57686600 |
| C  | 5.96707800  | -1.52417000 | -1.92970800 |
| H  | 5.84548300  | -3.64588600 | -1.64278400 |
| H  | 5.85068400  | 0.61552600  | -2.05564200 |
| H  | 6.75645600  | -1.59738700 | -2.67400000 |
| C  | 3.87707600  | -3.88464500 | 0.20347400  |
| H  | 2.98907400  | -3.61725800 | 0.79739000  |
| C  | 3.87955300  | 1.19860100  | -0.24876800 |
| H  | 2.82255100  | 1.03722800  | 0.02739200  |
| C  | -3.31809700 | -1.33209900 | -0.26170900 |
| H  | -2.35221400 | -1.77940800 | 0.01952400  |
| C  | -0.14781000 | 2.59756200  | -0.53078300 |
| H  | 0.54191500  | 1.74456800  | -0.40127400 |
| C  | 1.03989500  | -0.52142900 | -1.76407600 |
| H  | 0.02599400  | -0.24591100 | -2.10965100 |
| H  | 1.62625600  | 0.41583700  | -1.79124700 |
| C  | 1.64609800  | -1.49449700 | -2.76505800 |
| H  | 0.98898200  | -2.37091200 | -2.88581300 |
| H  | 2.60720400  | -1.88861800 | -2.39563500 |
| C  | 1.87999100  | -0.85821300 | -4.12890300 |
| H  | 0.94394700  | -0.46191200 | -4.54646000 |
| H  | 2.58638700  | -0.01929900 | -4.04919800 |
| H  | 2.29423800  | -1.56978300 | -4.85432500 |
| Co | 0.84696100  | -0.89494600 | 0.20805500  |
| C  | 0.23348600  | -2.92240200 | -0.27735600 |
| H  | 1.12584000  | -3.36268700 | -0.72056200 |
| H  | -0.61665100 | -2.79761400 | -0.94915800 |
| C  | 0.10209900  | -2.81935500 | 1.07200900  |
| H  | -0.85364400 | -2.57790600 | 1.53691700  |
| H  | 0.88690200  | -3.17053400 | 1.74047800  |
| H  | -4.68342700 | 0.12571500  | -2.13363400 |
| H  | -4.14013000 | 2.37822100  | -3.01223300 |
| C  | -4.13969900 | -1.29617100 | 1.01362400  |
| C  | -5.18559300 | -0.39023000 | 1.20147200  |
| C  | -3.86466800 | -2.21848500 | 2.02692100  |
| C  | -5.92712900 | -0.39734200 | 2.37930300  |
| H  | -5.41707400 | 0.33417300  | 0.42133100  |
| C  | -4.59928100 | -2.22450200 | 3.20850500  |
| H  | -3.07292100 | -2.95462400 | 1.87604800  |
| C  | -5.63222100 | -1.30857900 | 3.38947500  |
| H  | -6.73860900 | 0.31547900  | 2.50856800  |
| H  | -4.37036200 | -2.95001200 | 3.98608500  |

|   |             |             |             |
|---|-------------|-------------|-------------|
| H | -6.21104900 | -1.31045100 | 4.31017100  |
| C | -3.89510400 | -2.24907700 | -1.33158500 |
| C | -5.15111200 | -2.84260700 | -1.22472100 |
| C | -3.12036700 | -2.51895600 | -2.46626100 |
| C | -5.62189400 | -3.68943000 | -2.22754500 |
| H | -5.76799300 | -2.64915900 | -0.34937900 |
| C | -3.58599700 | -3.36378700 | -3.46404200 |
| H | -2.14254300 | -2.04344400 | -2.57129000 |
| C | -4.84325500 | -3.95392000 | -3.34658000 |
| H | -6.60497800 | -4.14415500 | -2.12664700 |
| H | -2.96846200 | -3.56349200 | -4.33690100 |
| H | -5.21135700 | -4.61691300 | -4.12603000 |
| C | 0.46702300  | 3.45831200  | -1.62912600 |
| C | 0.66014900  | 2.89768100  | -2.89895500 |
| C | 0.91880100  | 4.75936000  | -1.40610800 |
| C | 1.28852700  | 3.61143600  | -3.90971700 |
| H | 0.32104500  | 1.88048900  | -3.09095000 |
| C | 1.54908700  | 5.47872200  | -2.42147700 |
| H | 0.78989000  | 5.22225400  | -0.42981500 |
| C | 1.73906500  | 4.90888400  | -3.67356300 |
| H | 1.43175800  | 3.14927900  | -4.88465300 |
| H | 1.89345100  | 6.49176200  | -2.22513500 |
| H | 2.23388800  | 5.46963000  | -4.46318100 |
| C | -0.19455800 | 3.29158300  | 0.81492400  |
| C | 0.81285800  | 3.05478700  | 1.75366600  |
| C | -1.20261700 | 4.20467400  | 1.13078500  |
| C | 0.80900600  | 3.70118900  | 2.98673500  |
| H | 1.60932600  | 2.34519200  | 1.51412100  |
| C | -1.20543500 | 4.86111600  | 2.35772000  |
| H | -1.99108800 | 4.39997800  | 0.40381900  |
| C | -0.20300400 | 4.60741800  | 3.29199400  |
| H | 1.60006600  | 3.49843300  | 3.70674200  |
| H | -1.99421200 | 5.57437300  | 2.58613000  |
| H | -0.20754800 | 5.12154000  | 4.25027900  |
| C | 4.88019100  | -4.56447000 | 1.13388900  |
| H | 4.44889500  | -5.47065200 | 1.57708600  |
| H | 5.78102700  | -4.86437700 | 0.58296300  |
| H | 5.20068100  | -3.90621700 | 1.94983600  |
| C | 3.43123800  | -4.86240400 | -0.88306400 |
| H | 2.86667200  | -5.69380800 | -0.44326500 |
| H | 2.80041500  | -4.38074900 | -1.64128100 |
| H | 4.29177600  | -5.29692300 | -1.40661000 |
| C | 4.59796400  | 1.79637100  | 0.96167100  |
| H | 5.67565100  | 1.87592400  | 0.76639300  |

|   |            |            |             |
|---|------------|------------|-------------|
| H | 4.22364600 | 2.80692100 | 1.17049600  |
| H | 4.47077300 | 1.19902300 | 1.87319900  |
| C | 3.90259100 | 2.20204200 | -1.39512500 |
| H | 3.47109800 | 1.78873600 | -2.31511500 |
| H | 3.32289200 | 3.09499800 | -1.12493900 |
| H | 4.92387700 | 2.53697100 | -1.61924200 |

### TS-2/3

| Atom | x           | y           | z           |
|------|-------------|-------------|-------------|
| C    | 1.56176300  | -1.01639200 | 2.97065500  |
| C    | 1.40421500  | -1.11059500 | 4.35028500  |
| C    | 0.19577600  | -0.70369100 | 4.91103700  |
| C    | -0.80670900 | -0.18186700 | 4.09797900  |
| C    | -0.57920300 | -0.11213800 | 2.72650400  |
| N    | 0.57278400  | -0.54283600 | 2.19878200  |
| H    | 0.04122900  | -0.77981800 | 5.98342100  |
| H    | 2.20342800  | -1.49459800 | 4.97818600  |
| H    | -1.74568400 | 0.16175500  | 4.52350800  |
| C    | 2.78490700  | -1.34460300 | 2.20811500  |
| C    | -1.49387900 | 0.47931400  | 1.72647500  |
| N    | -1.18466000 | 0.25116300  | 0.48745300  |
| N    | 2.65754800  | -1.29921900 | 0.92132900  |
| C    | -2.62245800 | 1.30804200  | 2.22732700  |
| H    | -2.23553600 | 2.10966300  | 2.87000800  |
| H    | -3.20210600 | 1.75355000  | 1.41740400  |
| H    | -3.29594500 | 0.69085000  | 2.83652200  |
| C    | 4.03245900  | -1.66701800 | 2.95444900  |
| H    | 3.93144600  | -2.65386200 | 3.42728400  |
| H    | 4.90324900  | -1.68964100 | 2.29477600  |
| H    | 4.21017000  | -0.94367100 | 3.75806800  |
| C    | -1.93686100 | 0.89029500  | -0.54393700 |
| C    | -1.47748900 | 2.12574900  | -1.03502200 |
| C    | -3.07080000 | 0.26112200  | -1.08003500 |
| C    | -2.24481000 | 2.77648100  | -1.99998700 |
| C    | -3.80431200 | 0.94483000  | -2.05126900 |
| C    | -3.41264600 | 2.20285300  | -2.48867900 |
| H    | -1.90681300 | 3.73649000  | -2.38590100 |
| C    | 3.78192100  | -1.40377000 | 0.04707100  |
| C    | 4.27441400  | -2.65347500 | -0.36169600 |
| C    | 4.29953100  | -0.19299900 | -0.46134100 |
| C    | 5.32121800  | -2.66824800 | -1.28791500 |
| C    | 5.34411900  | -0.26633500 | -1.38056200 |
| C    | 5.85328300  | -1.49242100 | -1.79395300 |
| H    | 5.72240900  | -3.62529300 | -1.61779200 |

|    |             |             |             |
|----|-------------|-------------|-------------|
| H  | 5.76499100  | 0.65130800  | -1.78562500 |
| H  | 6.66665900  | -1.52785000 | -2.51475900 |
| C  | 3.71750400  | -3.96361600 | 0.15845100  |
| H  | 2.83380800  | -3.73652400 | 0.77381200  |
| C  | 3.75644100  | 1.14639100  | 0.00419900  |
| H  | 2.67599800  | 1.01219300  | 0.19571800  |
| C  | -3.47703100 | -1.12368200 | -0.59784800 |
| H  | -2.54017500 | -1.64696700 | -0.34743300 |
| C  | -0.16180600 | 2.69715900  | -0.52537900 |
| H  | 0.50776100  | 1.82901700  | -0.39357000 |
| C  | 0.84336700  | -0.74345800 | -1.83198300 |
| H  | -0.09881200 | -0.33796100 | -2.22600700 |
| H  | 1.40607800  | 0.10102300  | -1.37481200 |
| C  | 1.70678800  | -1.32269200 | -2.93212900 |
| H  | 1.16285900  | -2.12885200 | -3.44708500 |
| H  | 2.60270300  | -1.78650000 | -2.48951300 |
| C  | 2.13633300  | -0.28380400 | -3.95745900 |
| H  | 1.26909800  | 0.19313700  | -4.43410400 |
| H  | 2.74369000  | 0.50703500  | -3.49651400 |
| H  | 2.74073800  | -0.73960300 | -4.75025000 |
| Co | 0.61810800  | -0.96707800 | 0.27381400  |
| C  | 0.19075500  | -2.56787500 | -1.05589200 |
| H  | 1.05407800  | -3.08504900 | -1.47111100 |
| H  | -0.64472600 | -2.51526000 | -1.75741500 |
| C  | -0.10470300 | -2.84791600 | 0.31709300  |
| H  | -1.14332000 | -2.86476700 | 0.64910800  |
| H  | 0.56383600  | -3.50626900 | 0.87435400  |
| H  | -4.68698900 | 0.47098200  | -2.47744700 |
| H  | -4.00194600 | 2.72549100  | -3.23799000 |
| C  | -4.27955100 | -1.07194800 | 0.68893400  |
| C  | -5.34460300 | -0.18262300 | 0.85062500  |
| C  | -3.97388000 | -1.94472300 | 1.73523600  |
| C  | -6.07847200 | -0.16010200 | 2.03190900  |
| H  | -5.59678600 | 0.50368200  | 0.04250400  |
| C  | -4.69777800 | -1.91795700 | 2.92438600  |
| H  | -3.16140100 | -2.66244800 | 1.61308300  |
| C  | -5.75263700 | -1.02256800 | 3.07631500  |
| H  | -6.90723400 | 0.53628100  | 2.13876600  |
| H  | -4.44382900 | -2.60530100 | 3.72863100  |
| H  | -6.32508000 | -1.00238700 | 4.00081100  |
| C  | -4.13211800 | -1.95193100 | -1.69551100 |
| C  | -5.40565600 | -2.50459100 | -1.57417400 |
| C  | -3.41201900 | -2.19060400 | -2.87258600 |
| C  | -5.94582700 | -3.27703500 | -2.60171400 |

|   |             |             |             |
|---|-------------|-------------|-------------|
| H | -5.98485600 | -2.34061800 | -0.66798300 |
| C | -3.94621100 | -2.96095900 | -3.89592600 |
| H | -2.42148600 | -1.74699000 | -2.99039000 |
| C | -5.22085400 | -3.50885200 | -3.76293800 |
| H | -6.94177400 | -3.69922000 | -2.48718500 |
| H | -3.36895900 | -3.13406800 | -4.80153800 |
| H | -5.64353500 | -4.11224200 | -4.56282800 |
| C | 0.53449200  | 3.58602700  | -1.54634200 |
| C | 0.90122200  | 3.02201100  | -2.77400700 |
| C | 0.87114300  | 4.91595300  | -1.29905700 |
| C | 1.58939200  | 3.76125700  | -3.72555000 |
| H | 0.64581700  | 1.98091800  | -2.97777100 |
| C | 1.56343100  | 5.66119000  | -2.25360600 |
| H | 0.60485000  | 5.37835300  | -0.35083400 |
| C | 1.92684400  | 5.08870900  | -3.46565800 |
| H | 1.86941600  | 3.29870700  | -4.67040500 |
| H | 1.81960100  | 6.69687100  | -2.04132600 |
| H | 2.46901700  | 5.67140700  | -4.20670500 |
| C | -0.27766500 | 3.33073000  | 0.84591100  |
| C | 0.68711200  | 3.05650600  | 1.81842700  |
| C | -1.30840100 | 4.21963300  | 1.15635300  |
| C | 0.61653100  | 3.63969000  | 3.08022500  |
| H | 1.50225100  | 2.36825000  | 1.58082400  |
| C | -1.37654500 | 4.81466000  | 2.41247600  |
| H | -2.06578100 | 4.44309200  | 0.40476300  |
| C | -0.41841300 | 4.52140800  | 3.38048600  |
| H | 1.37414800  | 3.40858600  | 3.82667000  |
| H | -2.18331000 | 5.50844000  | 2.63815300  |
| H | -0.47580900 | 4.98395100  | 4.36303300  |
| C | 4.73607900  | -4.68749100 | 1.03924800  |
| H | 4.30730400  | -5.60938700 | 1.45107200  |
| H | 5.62246300  | -4.96952400 | 0.45634500  |
| H | 5.07960000  | -4.06783700 | 1.87573600  |
| C | 3.27062500  | -4.88974700 | -0.97185700 |
| H | 2.72405900  | -5.75091100 | -0.56869400 |
| H | 2.62067000  | -4.38346300 | -1.69598600 |
| H | 4.13051200  | -5.28347500 | -1.52839800 |
| C | 4.40307400  | 1.58343500  | 1.31984900  |
| H | 5.49390200  | 1.63968100  | 1.20694000  |
| H | 4.04802000  | 2.57964800  | 1.61434200  |
| H | 4.19071300  | 0.89632000  | 2.14798000  |
| C | 3.90551500  | 2.26202400  | -1.02207500 |
| H | 3.51821300  | 1.97917700  | -2.00834200 |
| H | 3.35273700  | 3.15219000  | -0.69376700 |

H 4.95425100 2.56318900 -1.14188600

### 3

| Atom | x           | y           | z           |
|------|-------------|-------------|-------------|
| C    | 0.96082900  | -1.32922300 | 3.35980700  |
| C    | 0.69717800  | -1.32837700 | 4.72708800  |
| C    | -0.47206500 | -0.71245600 | 5.16832200  |
| C    | -1.32617300 | -0.08825100 | 4.26268800  |
| C    | -0.99814000 | -0.14422800 | 2.91063000  |
| N    | 0.08791400  | -0.79991100 | 2.50229800  |
| H    | -0.70194600 | -0.69183100 | 6.23010800  |
| H    | 1.39124500  | -1.77360000 | 5.43365100  |
| H    | -2.21245600 | 0.43782500  | 4.60574200  |
| C    | 2.22591600  | -1.77083100 | 2.71342300  |
| C    | -1.73391700 | 0.51847000  | 1.79718900  |
| N    | -1.13158300 | 0.46075500  | 0.65635700  |
| N    | 2.34310600  | -1.42488300 | 1.47627200  |
| C    | -3.00427400 | 1.21903300  | 2.10238200  |
| H    | -3.70548500 | 0.54608900  | 2.61139900  |
| H    | -2.78725500 | 2.05715200  | 2.78086600  |
| H    | -3.47714100 | 1.61856100  | 1.20401600  |
| C    | 3.25619400  | -2.44959600 | 3.54187000  |
| H    | 3.44667800  | -1.87542500 | 4.45690300  |
| H    | 2.90126400  | -3.44041600 | 3.85568200  |
| H    | 4.19640600  | -2.56518800 | 2.99807600  |
| C    | -1.72490200 | 0.94688300  | -0.54401400 |
| C    | -1.31855400 | 2.19907200  | -1.02890700 |
| C    | -2.57057600 | 0.09235000  | -1.27690800 |
| C    | -1.86923100 | 2.64730400  | -2.22885700 |
| C    | -3.08491900 | 0.57807500  | -2.47802700 |
| C    | -2.76077800 | 1.85061800  | -2.93589300 |
| H    | -1.57076600 | 3.61639200  | -2.62365000 |
| C    | 3.53612900  | -1.62654200 | 0.72299600  |
| C    | 3.90547700  | -2.88246000 | 0.21394900  |
| C    | 4.25790600  | -0.45384100 | 0.41982400  |
| C    | 5.05839600  | -2.94043200 | -0.57566600 |
| C    | 5.40190800  | -0.56929900 | -0.36468400 |
| C    | 5.80381900  | -1.80598100 | -0.85826600 |
| H    | 5.37269200  | -3.90173400 | -0.97910000 |
| H    | 5.98215100  | 0.31921800  | -0.60380500 |
| H    | 6.69797600  | -1.88088800 | -1.47272000 |
| C    | 3.11205600  | -4.15146800 | 0.46021400  |
| H    | 2.19564700  | -3.88515700 | 1.00871700  |
| C    | 3.79817300  | 0.88105800  | 0.96905500  |

|    |             |             |             |
|----|-------------|-------------|-------------|
| H  | 2.69140000  | 0.85299800  | 1.00442500  |
| C  | -2.80412100 | -1.33032800 | -0.77609300 |
| H  | -1.82531500 | -1.65341200 | -0.38345200 |
| C  | -0.25960300 | 2.97479600  | -0.25867400 |
| H  | 0.48715000  | 2.21649200  | 0.04271200  |
| C  | 0.82143200  | -1.36680200 | -1.34069800 |
| H  | 1.35853400  | -2.32872800 | -1.30410900 |
| H  | -0.08972400 | -1.52064800 | -1.93073100 |
| C  | 1.69838800  | -0.30252700 | -1.99681200 |
| H  | 2.41868700  | 0.12926000  | -1.27528800 |
| H  | 1.06367500  | 0.52965700  | -2.34600400 |
| C  | 2.53709100  | -0.82646500 | -3.15858200 |
| H  | 3.21382700  | -1.60902000 | -2.77174900 |
| H  | 1.88178200  | -1.32234700 | -3.89267500 |
| Co | 0.58378000  | -0.72743000 | 0.50858600  |
| C  | 3.35969500  | 0.25506200  | -3.84153500 |
| H  | 2.68283400  | 0.98946300  | -4.30554500 |
| H  | 3.92858000  | 0.80819900  | -3.07459500 |
| C  | 4.31754500  | -0.30494100 | -4.87796800 |
| H  | 4.89466300  | 0.48244400  | -5.37615000 |
| H  | 5.03141900  | -0.99797600 | -4.41259700 |
| H  | 3.77908200  | -0.86292200 | -5.65498000 |
| C  | -3.77805700 | -1.42692600 | 0.38522800  |
| C  | -4.98637500 | -0.72773100 | 0.40747900  |
| C  | -3.47919100 | -2.27913600 | 1.45188900  |
| C  | -5.87460200 | -0.87987300 | 1.46778800  |
| H  | -5.22550400 | -0.04224400 | -0.40567600 |
| C  | -4.35761500 | -2.42394100 | 2.52098100  |
| H  | -2.54425400 | -2.84253800 | 1.43349000  |
| C  | -5.56141000 | -1.72378200 | 2.53061200  |
| H  | -6.81385300 | -0.33110700 | 1.46728400  |
| H  | -4.10648900 | -3.09183800 | 3.34240300  |
| H  | -6.25657000 | -1.83974300 | 3.35895900  |
| C  | -3.16642200 | -2.34235600 | -1.85226200 |
| C  | -2.22323000 | -3.29486200 | -2.24286700 |
| C  | -4.43674300 | -2.38953300 | -2.43553800 |
| C  | -2.52615600 | -4.25001400 | -3.20890500 |
| H  | -1.23760800 | -3.29219600 | -1.77798200 |
| C  | -4.74071900 | -3.33838500 | -3.40514000 |
| H  | -5.20501800 | -1.68561300 | -2.11813400 |
| C  | -3.78456000 | -4.27062600 | -3.79848700 |
| H  | -1.77475400 | -4.98182200 | -3.49724900 |
| H  | -5.73367400 | -3.35510000 | -3.84905800 |
| H  | -4.02438500 | -5.01503500 | -4.55416000 |

|   |             |             |             |
|---|-------------|-------------|-------------|
| C | -0.79409800 | 3.57379600  | 1.02744600  |
| C | -0.05562500 | 3.46028200  | 2.20719400  |
| C | -2.01619500 | 4.24871300  | 1.06627500  |
| C | -0.52841600 | 3.99644400  | 3.40118100  |
| H | 0.90295600  | 2.93678600  | 2.18392900  |
| C | -2.48543100 | 4.80200700  | 2.25397300  |
| H | -2.61179600 | 4.32668000  | 0.15630900  |
| C | -1.74621800 | 4.67227800  | 3.42690700  |
| H | 0.05722300  | 3.89291500  | 4.31240300  |
| H | -3.43652100 | 5.32982800  | 2.26458100  |
| H | -2.11582700 | 5.09908300  | 4.35642300  |
| C | 0.49099300  | 3.97531900  | -1.12263800 |
| C | 0.15422400  | 5.32772300  | -1.18733900 |
| C | 1.55119500  | 3.51285800  | -1.90745300 |
| C | 0.85840000  | 6.19375400  | -2.02043100 |
| H | -0.65747300 | 5.71555500  | -0.57456400 |
| C | 2.26124100  | 4.37606500  | -2.73275600 |
| H | 1.82735300  | 2.45884300  | -1.85646500 |
| C | 1.91369600  | 5.72287700  | -2.79382000 |
| H | 0.58291500  | 7.24550500  | -2.05695800 |
| H | 3.09214700  | 3.99712100  | -3.32494600 |
| H | 2.46678400  | 6.40287700  | -3.43757700 |
| C | 2.68747300  | -4.82442700 | -0.84533100 |
| H | 3.55728000  | -5.18339600 | -1.40963400 |
| H | 2.05568800  | -5.69549700 | -0.63286200 |
| H | 2.12504200  | -4.14859800 | -1.50014100 |
| C | 3.90465200  | -5.14951700 | 1.30587900  |
| H | 4.79572100  | -5.49480800 | 0.76637300  |
| H | 4.24421300  | -4.72160000 | 2.25584600  |
| H | 3.29587100  | -6.03397100 | 1.53039200  |
| C | 4.29756000  | 1.08882100  | 2.39945700  |
| H | 5.39549000  | 1.07895700  | 2.42168000  |
| H | 3.96457600  | 2.05808600  | 2.79148200  |
| H | 3.94506900  | 0.30884700  | 3.08626900  |
| C | 4.20178600  | 2.07046200  | 0.10758000  |
| H | 3.68693400  | 2.97670800  | 0.45112400  |
| H | 5.27950200  | 2.26914000  | 0.17215400  |
| H | 3.94737400  | 1.92136300  | -0.94996300 |
| H | -3.72440000 | -0.06156100 | -3.08162000 |
| H | -3.17782100 | 2.20760500  | -3.87437100 |

### Co3

Doublet:

1

| Atom | x           | y           | z           |
|------|-------------|-------------|-------------|
| C    | 0.00200600  | 0.14433100  | 2.86422800  |
| C    | -0.00362800 | 0.28551900  | 4.24805900  |
| C    | 1.14252600  | -0.08463700 | 4.94925300  |
| C    | 2.26085700  | -0.56999200 | 4.27275200  |
| C    | 2.18770700  | -0.69331000 | 2.88884700  |
| N    | 1.07338000  | -0.34797100 | 2.23649100  |
| H    | 1.16963200  | 0.01760000  | 6.03016600  |
| H    | -0.87257000 | 0.68338100  | 4.76459600  |
| H    | 3.16319300  | -0.84105100 | 4.81359100  |
| C    | -1.04068400 | 0.55646700  | 1.90460100  |
| C    | 3.23318300  | -1.15391600 | 1.95553200  |
| N    | 2.87277000  | -1.17137400 | 0.70453000  |
| N    | -0.76234600 | 0.28421600  | 0.65787600  |
| C    | 4.57255800  | -1.49181900 | 2.50047000  |
| H    | 5.00464000  | -0.60440500 | 2.98263600  |
| H    | 4.48261000  | -2.25996200 | 3.27949000  |
| H    | 5.26290900  | -1.84188500 | 1.73113000  |
| C    | -2.22244700 | 1.28302500  | 2.42988600  |
| H    | -2.77152400 | 0.64099200  | 3.13192200  |
| H    | -1.87660700 | 2.16514400  | 2.98610400  |
| H    | -2.90803400 | 1.60792500  | 1.64652200  |
| C    | 3.83206800  | -1.55295000 | -0.29726400 |
| C    | 3.85840900  | -2.88170000 | -0.75318500 |
| C    | 4.67858900  | -0.55887100 | -0.82541100 |
| C    | 4.72522900  | -3.18726600 | -1.80454700 |
| C    | 5.51721900  | -0.91943200 | -1.87962900 |
| C    | 5.53376500  | -2.21652100 | -2.37551300 |
| H    | 4.76998900  | -4.20824000 | -2.17719300 |
| H    | 6.17881600  | -0.17492400 | -2.31634800 |
| H    | 6.19347300  | -2.47406000 | -3.20052400 |
| C    | -1.66841800 | 0.77096100  | -0.34063300 |
| C    | -1.35111100 | 1.99289100  | -0.95187000 |
| C    | -2.82105900 | 0.03846000  | -0.66892700 |
| C    | -2.24916200 | 2.53476500  | -1.86744800 |
| C    | -3.70749300 | 0.64297500  | -1.55687400 |
| C    | -3.42680400 | 1.86970100  | -2.14446200 |
| H    | -2.03915700 | 3.47467100  | -2.37369800 |
| C    | -0.04133700 | 2.67740700  | -0.60326100 |
| H    | 0.67427300  | 1.84752200  | -0.47353600 |
| C    | -3.06862300 | -1.34392700 | -0.08447500 |
| H    | -2.06535500 | -1.72607800 | 0.16542100  |
| C    | 4.67165400  | 0.86119500  | -0.28723300 |

|    |             |             |             |
|----|-------------|-------------|-------------|
| H  | 4.49255700  | 0.81203300  | 0.79944400  |
| C  | 3.05438600  | -3.98285600 | -0.08864100 |
| H  | 2.19122800  | -3.51786400 | 0.41330900  |
| C  | 0.90237000  | -0.83116700 | -1.54641900 |
| H  | 0.24392400  | -0.11096800 | -2.06269300 |
| H  | 1.88947900  | -0.78779900 | -2.03850600 |
| C  | 0.31648400  | -2.22715000 | -1.71215700 |
| H  | -0.72135800 | -2.25582300 | -1.34563200 |
| H  | 0.86456600  | -2.95353800 | -1.09210400 |
| C  | 0.33122100  | -2.71637100 | -3.15419700 |
| H  | -0.20990800 | -2.01868700 | -3.80871500 |
| H  | 1.36060000  | -2.77990700 | -3.53392500 |
| H  | -0.13518700 | -3.70455000 | -3.26171800 |
| Co | 1.02217400  | -0.51561800 | 0.35134800  |
| C  | 3.89422300  | -4.68602500 | 0.97949500  |
| H  | 4.24187500  | -4.00257100 | 1.76210000  |
| H  | 3.31863600  | -5.48604500 | 1.46133200  |
| H  | 4.78269800  | -5.14300300 | 0.52365600  |
| C  | 2.52131900  | -5.02639400 | -1.06711100 |
| H  | 3.31998800  | -5.68671100 | -1.42738700 |
| H  | 1.78514300  | -5.66680700 | -0.56689300 |
| H  | 2.03991500  | -4.57681400 | -1.94273200 |
| C  | 5.99148400  | 1.59405200  | -0.48789400 |
| H  | 6.16929300  | 1.83091000  | -1.54438600 |
| H  | 5.97365800  | 2.54804100  | 0.05148500  |
| H  | 6.84684900  | 1.01371700  | -0.12254100 |
| C  | 3.52754100  | 1.66246500  | -0.90229600 |
| H  | 3.52191000  | 2.69815800  | -0.53793100 |
| H  | 3.61341300  | 1.69031300  | -1.99680700 |
| H  | 2.55809600  | 1.20585000  | -0.66352100 |
| C  | 0.48937700  | 3.53273200  | -1.74171800 |
| C  | 0.93672700  | 2.89072400  | -2.90261900 |
| C  | 0.53800200  | 4.92491200  | -1.68664300 |
| C  | 1.41733700  | 3.62139900  | -3.98067000 |
| H  | 0.90492300  | 1.80194800  | -2.95596000 |
| C  | 1.01706800  | 5.65986100  | -2.77018900 |
| H  | 0.20605100  | 5.44603600  | -0.79090600 |
| C  | 1.45735500  | 5.01292900  | -3.91781400 |
| H  | 1.76116000  | 3.10405100  | -4.87360600 |
| H  | 1.04640100  | 6.74546300  | -2.71033500 |
| H  | 1.83137900  | 5.58813100  | -4.76149600 |
| C  | -0.09638600 | 3.40049200  | 0.72866000  |
| C  | 0.98322200  | 3.30699000  | 1.61182300  |
| C  | -1.19189900 | 4.18574400  | 1.09346100  |

|   |             |             |             |
|---|-------------|-------------|-------------|
| C | 0.96086800  | 3.96198300  | 2.83940200  |
| H | 1.85893300  | 2.71991800  | 1.32424700  |
| C | -1.21169700 | 4.85585600  | 2.31331100  |
| H | -2.04069300 | 4.26809300  | 0.41448600  |
| C | -0.13966200 | 4.73766300  | 3.19439300  |
| H | 1.80917600  | 3.87680500  | 3.51556800  |
| H | -2.07054500 | 5.46825500  | 2.57875900  |
| H | -0.15741200 | 5.25786000  | 4.14919100  |
| C | -3.81846600 | -1.28954200 | 1.23146700  |
| C | -5.02902600 | -0.60373900 | 1.35672400  |
| C | -3.29862000 | -1.94614100 | 2.34830800  |
| C | -5.68977800 | -0.55586200 | 2.57895200  |
| H | -5.46158400 | -0.11290000 | 0.48637800  |
| C | -3.95906500 | -1.90207500 | 3.57408000  |
| H | -2.36501400 | -2.50341000 | 2.25280100  |
| C | -5.15390700 | -1.19901400 | 3.69325900  |
| H | -6.63155700 | -0.01822000 | 2.66185100  |
| H | -3.54244500 | -2.42263700 | 4.43393500  |
| H | -5.67414300 | -1.16135300 | 4.64750100  |
| C | -3.64068400 | -2.34089700 | -1.08835100 |
| C | -3.13033300 | -2.38210700 | -2.39017600 |
| C | -4.60824100 | -3.27641400 | -0.72458700 |
| C | -3.57164300 | -3.33199600 | -3.30159600 |
| H | -2.38327200 | -1.65132500 | -2.70040100 |
| C | -5.05545900 | -4.22742400 | -1.63931600 |
| H | -5.02282500 | -3.26585000 | 0.28134600  |
| C | -4.53939100 | -4.26141000 | -2.92869300 |
| H | -3.15910800 | -3.34182900 | -4.30860100 |
| H | -5.81495800 | -4.94468300 | -1.33615900 |
| H | -4.89150000 | -5.00328000 | -3.64158800 |
| F | -4.86319400 | 0.05461900  | -1.86689700 |
| F | -4.31143000 | 2.38727000  | -2.99223300 |

## 2

| Atom | x           | y           | z          |
|------|-------------|-------------|------------|
| C    | 2.00323800  | -0.75711100 | 2.98256400 |
| C    | 2.06349700  | -0.55001400 | 4.35797800 |
| C    | 0.94127100  | -0.03339300 | 5.00019400 |
| C    | -0.19320600 | 0.29940800  | 4.26529200 |
| C    | -0.18368200 | 0.06975300  | 2.89220200 |
| N    | 0.88147300  | -0.48578500 | 2.30097100 |
| H    | 0.96008500  | 0.13452200  | 6.07301400 |
| H    | 2.96618300  | -0.78034200 | 4.91707400 |
| H    | -1.05773300 | 0.74394900  | 4.74981600 |

|   |             |             |             |
|---|-------------|-------------|-------------|
| C | 3.09831400  | -1.17334800 | 2.09179500  |
| C | -1.20752000 | 0.47879900  | 1.91642200  |
| N | -0.90970400 | 0.20843700  | 0.67675500  |
| N | 2.78779800  | -1.19280800 | 0.82855200  |
| C | -2.40714200 | 1.20102400  | 2.41468000  |
| H | -2.09687200 | 2.07363800  | 3.00400400  |
| H | -3.06261900 | 1.53647200  | 1.60950300  |
| H | -2.98448800 | 0.54003000  | 3.07569800  |
| C | 4.43537500  | -1.45889000 | 2.67752800  |
| H | 4.39114500  | -2.38923500 | 3.26012400  |
| H | 5.20566500  | -1.56330300 | 1.91096500  |
| H | 4.73416200  | -0.66364500 | 3.37077900  |
| C | -1.75694100 | 0.75712400  | -0.33992100 |
| C | -1.37355900 | 1.98743300  | -0.90227700 |
| C | -2.90761400 | 0.06925600  | -0.75721800 |
| C | -2.21032700 | 2.57319000  | -1.85047400 |
| C | -3.70516500 | 0.69567400  | -1.70941600 |
| C | -3.37092500 | 1.93373500  | -2.23602600 |
| H | -1.96072900 | 3.52580200  | -2.31150200 |
| C | 3.83396600  | -1.36009000 | -0.14008300 |
| C | 4.28992400  | -2.63492000 | -0.50957100 |
| C | 4.33620400  | -0.18245100 | -0.72943100 |
| C | 5.28204800  | -2.70988900 | -1.49068100 |
| C | 5.32364800  | -0.31648900 | -1.70441600 |
| C | 5.79450200  | -1.56724800 | -2.08492600 |
| H | 5.65231400  | -3.68717100 | -1.79668500 |
| H | 5.73346600  | 0.57407000  | -2.17575900 |
| H | 6.56400300  | -1.64910600 | -2.84887500 |
| C | 3.73699500  | -3.91407400 | 0.08602900  |
| H | 2.90316800  | -3.64611900 | 0.75256200  |
| C | 3.86018400  | 1.19230900  | -0.29576800 |
| H | 2.80676100  | 1.09367900  | 0.01810400  |
| C | -3.27045100 | -1.29469400 | -0.20003400 |
| H | -2.33532700 | -1.68881800 | 0.22310000  |
| C | -0.06741000 | 2.64373500  | -0.48353200 |
| H | 0.64655800  | 1.81521400  | -0.34042200 |
| C | 0.94400700  | -0.60296700 | -1.52018400 |
| H | -0.04984700 | -0.26114400 | -1.85663700 |
| H | 1.59655000  | 0.29327500  | -1.51651300 |
| C | 1.48842700  | -1.56918800 | -2.55754400 |
| H | 0.78485700  | -2.40269800 | -2.70903600 |
| H | 2.43105400  | -2.02246700 | -2.21881200 |
| C | 1.73527100  | -0.89120200 | -3.89974000 |
| H | 0.81129500  | -0.45182200 | -4.30079000 |

|    |             |             |             |
|----|-------------|-------------|-------------|
| H  | 2.47510900  | -0.08421900 | -3.80073300 |
| H  | 2.11676100  | -1.59718800 | -4.64753900 |
| Co | 0.82964300  | -0.85777900 | 0.42956300  |
| C  | 0.15339800  | -2.83308700 | -0.14097800 |
| H  | 1.00233900  | -3.30498000 | -0.62940300 |
| H  | -0.72873700 | -2.69717100 | -0.76633300 |
| C  | 0.08144700  | -2.77846500 | 1.21795400  |
| H  | -0.85455600 | -2.56441400 | 1.73413700  |
| H  | 0.87876800  | -3.18746000 | 1.83833800  |
| F  | -4.83311600 | 0.12050500  | -2.12847800 |
| F  | -4.18389200 | 2.48734600  | -3.13149700 |
| C  | -4.23743600 | -1.21710700 | 0.96746700  |
| C  | -5.37761000 | -0.41024300 | 0.94790200  |
| C  | -3.98409300 | -1.98892300 | 2.10379200  |
| C  | -6.22216600 | -0.35568100 | 2.05192700  |
| H  | -5.61829600 | 0.17229800  | 0.06137200  |
| C  | -4.82994200 | -1.94053200 | 3.20811100  |
| H  | -3.11468200 | -2.64824900 | 2.11286700  |
| C  | -5.94859800 | -1.11321100 | 3.18758200  |
| H  | -7.10405500 | 0.28023800  | 2.02264500  |
| H  | -4.61496400 | -2.55032600 | 4.08295400  |
| H  | -6.61155300 | -1.06764800 | 4.04834200  |
| C  | -3.66409200 | -2.29005100 | -1.28654200 |
| C  | -4.77465400 | -3.12225700 | -1.16898300 |
| C  | -2.84575400 | -2.41685600 | -2.41478900 |
| C  | -5.05812500 | -4.06564100 | -2.15423400 |
| H  | -5.42899500 | -3.03741100 | -0.30396100 |
| C  | -3.12615700 | -3.35903500 | -3.39623500 |
| H  | -1.98453500 | -1.75539000 | -2.53130200 |
| C  | -4.23634000 | -4.18992900 | -3.26772700 |
| H  | -5.93141300 | -4.70526200 | -2.04777200 |
| H  | -2.47835000 | -3.44035300 | -4.26635600 |
| H  | -4.45936000 | -4.92740300 | -4.03504900 |
| C  | 0.52934300  | 3.52046200  | -1.57662400 |
| C  | 0.80616800  | 2.94069800  | -2.82108800 |
| C  | 0.86204900  | 4.85954500  | -1.37698000 |
| C  | 1.40522600  | 3.67493600  | -3.83468800 |
| H  | 0.55356100  | 1.89330500  | -2.98694700 |
| C  | 1.46434700  | 5.59922600  | -2.39480100 |
| H  | 0.66182900  | 5.33394800  | -0.41838500 |
| C  | 1.74011600  | 5.01136700  | -3.62259600 |
| H  | 1.61625600  | 3.20009400  | -4.79096700 |
| H  | 1.71776200  | 6.64253600  | -2.22009800 |
| H  | 2.21223000  | 5.58941100  | -4.41353100 |

|   |             |             |             |
|---|-------------|-------------|-------------|
| C | -0.16085700 | 3.33610400  | 0.86058500  |
| C | 0.87674800  | 3.18217700  | 1.78382700  |
| C | -1.23407200 | 4.16567300  | 1.18953500  |
| C | 0.83630700  | 3.82374800  | 3.01808400  |
| H | 1.72662300  | 2.54573300  | 1.52309100  |
| C | -1.27452200 | 4.81678500  | 2.41904200  |
| H | -2.04571900 | 4.29946600  | 0.47411300  |
| C | -0.24349600 | 4.64191200  | 3.33976900  |
| H | 1.64966600  | 3.68643500  | 3.72811200  |
| H | -2.11587600 | 5.46238100  | 2.66068500  |
| H | -0.27821700 | 5.15000400  | 4.30061600  |
| C | 4.78702200  | -4.65095400 | 0.91647500  |
| H | 4.35770100  | -5.55227000 | 1.37101700  |
| H | 5.62933100  | -4.97025900 | 0.28952600  |
| H | 5.19570200  | -4.02730900 | 1.71940400  |
| C | 3.19004900  | -4.84579500 | -0.99583400 |
| H | 2.64741100  | -5.68466600 | -0.54289200 |
| H | 2.51094000  | -4.32795500 | -1.68476000 |
| H | 4.00195000  | -5.27083200 | -1.59905300 |
| C | 4.65968700  | 1.70793500  | 0.90296200  |
| H | 5.73491200  | 1.69421900  | 0.68060900  |
| H | 4.38407900  | 2.74514500  | 1.13301100  |
| H | 4.50097500  | 1.11390400  | 1.81154700  |
| C | 3.91063500  | 2.22688900  | -1.41404100 |
| H | 3.45235400  | 1.85967900  | -2.34027300 |
| H | 3.37202500  | 3.13543700  | -1.11312800 |
| H | 4.94232800  | 2.52585600  | -1.64122600 |

### TS-2/3

| Atom | x           | y           | z          |
|------|-------------|-------------|------------|
| C    | 1.01994200  | -1.08506300 | 3.54908300 |
| C    | 0.60944000  | -1.25611900 | 4.86764900 |
| C    | -0.67557000 | -0.83974200 | 5.21706700 |
| C    | -1.52708400 | -0.27874400 | 4.26524400 |
| C    | -1.04894800 | -0.13089900 | 2.96804400 |
| N    | 0.19798000  | -0.50875700 | 2.66041600 |
| H    | -1.02151200 | -0.96685600 | 6.23883200 |
| H    | 1.26530400  | -1.71332700 | 5.60356700 |
| H    | -2.53790600 | 0.02464900  | 4.52412600 |
| C    | 2.29867100  | -1.45610400 | 2.91466900 |
| C    | -1.74196800 | 0.41256700  | 1.78576600 |
| N    | -1.08401700 | 0.24771300  | 0.66809800 |
| N    | 2.31261500  | -1.28984600 | 1.62281900 |
| C    | -3.04398200 | 1.09748000  | 1.96786700 |

|    |             |             |             |
|----|-------------|-------------|-------------|
| H  | -3.77460200 | 0.39786800  | 2.39569400  |
| H  | -2.91998400 | 1.92362100  | 2.68121000  |
| H  | -3.44568400 | 1.49352500  | 1.03396600  |
| C  | 3.43165800  | -1.92822600 | 3.74831400  |
| H  | 3.53364900  | -1.30211300 | 4.64231400  |
| H  | 3.24562800  | -2.95495200 | 4.09312400  |
| H  | 4.37371000  | -1.91688500 | 3.19499600  |
| C  | -1.62040700 | 0.81889300  | -0.52784700 |
| C  | -1.16666600 | 2.08859900  | -0.91408800 |
| C  | -2.56213900 | 0.08822300  | -1.26856700 |
| C  | -1.77331000 | 2.69488700  | -2.01253300 |
| C  | -3.15484200 | 0.74602700  | -2.34191200 |
| C  | -2.77450300 | 2.03366100  | -2.69739200 |
| H  | -1.46860200 | 3.68136100  | -2.35463400 |
| C  | 3.51383100  | -1.46301500 | 0.86095500  |
| C  | 3.97496400  | -2.73678000 | 0.50031200  |
| C  | 4.12809200  | -0.28171300 | 0.39806100  |
| C  | 5.11276500  | -2.80299200 | -0.30987800 |
| C  | 5.25692600  | -0.40369000 | -0.40713200 |
| C  | 5.75143800  | -1.65644900 | -0.75518300 |
| H  | 5.49591800  | -3.77901300 | -0.60316100 |
| H  | 5.75351500  | 0.49077500  | -0.77568900 |
| H  | 6.63300200  | -1.73457600 | -1.38673300 |
| C  | 3.27755500  | -4.01852800 | 0.90958700  |
| H  | 2.39125100  | -3.75418000 | 1.50533800  |
| C  | 3.56045800  | 1.07030400  | 0.78093500  |
| H  | 2.45611200  | 0.95844000  | 0.73211900  |
| C  | -2.87615800 | -1.35405200 | -0.90725800 |
| H  | -1.96825700 | -1.71246500 | -0.39526700 |
| C  | -0.03478900 | 2.74706500  | -0.13896100 |
| H  | 0.65042800  | 1.91803200  | 0.12811500  |
| C  | 0.94749900  | -1.28694000 | -0.94545400 |
| H  | 1.67681600  | -2.10403100 | -0.83127700 |
| H  | 0.01111700  | -1.75674000 | -1.29493800 |
| C  | 1.46369200  | -0.34148400 | -2.01745000 |
| H  | 2.23660000  | 0.32931700  | -1.60070700 |
| H  | 0.64593600  | 0.31600900  | -2.36285300 |
| C  | 2.08071000  | -1.05094800 | -3.21583600 |
| H  | 2.88540900  | -1.71640800 | -2.85594600 |
| H  | 1.33259600  | -1.71252200 | -3.68509800 |
| Co | 0.66713700  | -0.58265500 | 0.84728200  |
| C  | 2.64585000  | -0.08635200 | -4.24724300 |
| H  | 1.84203400  | 0.57701900  | -4.60555200 |
| H  | 3.38077900  | 0.57004300  | -3.75122300 |

|   |             |             |             |
|---|-------------|-------------|-------------|
| C | 3.29385000  | -0.79381800 | -5.42396200 |
| H | 3.69736100  | -0.08774900 | -6.15845900 |
| H | 4.12007100  | -1.43548400 | -5.09132400 |
| H | 2.57166600  | -1.43600500 | -5.94432200 |
| F | -4.11427700 | 0.15590500  | -3.05433200 |
| F | -3.38172600 | 2.61548500  | -3.72811700 |
| C | -3.99339700 | -1.46119900 | 0.10973400  |
| C | -5.22682600 | -0.83685100 | -0.09218300 |
| C | -3.79585200 | -2.19824500 | 1.27865400  |
| C | -6.22904400 | -0.92811800 | 0.86668500  |
| H | -5.40443000 | -0.28521800 | -1.01409300 |
| C | -4.79614200 | -2.28832600 | 2.24378900  |
| H | -2.84334700 | -2.70981500 | 1.42951600  |
| C | -6.01442100 | -1.64646900 | 2.04175000  |
| H | -7.18500400 | -0.43806100 | 0.69625800  |
| H | -4.62451100 | -2.86509100 | 3.15037700  |
| H | -6.79966500 | -1.71476900 | 2.79105500  |
| C | -3.03397200 | -2.26254500 | -2.12232500 |
| C | -2.09864400 | -2.18547600 | -3.16015600 |
| C | -4.03358200 | -3.23024400 | -2.19743900 |
| C | -2.16198500 | -3.05160000 | -4.24329600 |
| H | -1.31470600 | -1.42844000 | -3.12284300 |
| C | -4.09843700 | -4.09988000 | -3.28417700 |
| H | -4.77172800 | -3.31267500 | -1.40272900 |
| C | -3.16489000 | -4.01571100 | -4.30934400 |
| H | -1.42519500 | -2.97176900 | -5.04001200 |
| H | -4.88834000 | -4.84666100 | -3.32574000 |
| H | -3.21718400 | -4.69485700 | -5.15701200 |
| C | -0.50299000 | 3.32814200  | 1.18033600  |
| C | 0.23244600  | 3.08959800  | 2.34311900  |
| C | -1.63516300 | 4.14149600  | 1.25726900  |
| C | -0.16642800 | 3.62660900  | 3.56397900  |
| H | 1.12796100  | 2.46497400  | 2.28890100  |
| C | -2.03139400 | 4.69022300  | 2.47295300  |
| H | -2.20933700 | 4.34716900  | 0.35389600  |
| C | -1.30287000 | 4.42787300  | 3.63128900  |
| H | 0.41296700  | 3.42160400  | 4.46187000  |
| H | -2.91303500 | 5.32569300  | 2.51570800  |
| H | -1.61633000 | 4.85403800  | 4.58138900  |
| C | 0.78672800  | 3.72853200  | -0.96746000 |
| C | 1.10039900  | 5.01031300  | -0.51321100 |
| C | 1.31788200  | 3.31291500  | -2.19508300 |
| C | 1.92622200  | 5.84854400  | -1.26137300 |
| H | 0.70702900  | 5.36551700  | 0.43671900  |

|   |            |             |             |
|---|------------|-------------|-------------|
| C | 2.13918800 | 4.14603200  | -2.94170400 |
| H | 1.09160700 | 2.31529600  | -2.56709300 |
| C | 2.45060600 | 5.42095500  | -2.47424600 |
| H | 2.15760200 | 6.84332700  | -0.88725500 |
| H | 2.54090700 | 3.79365800  | -3.88985400 |
| H | 3.09522800 | 6.07581200  | -3.05577300 |
| C | 2.79201800 | -4.79916200 | -0.31186800 |
| H | 3.63501600 | -5.15169700 | -0.91931000 |
| H | 2.22124600 | -5.68253200 | -0.00083400 |
| H | 2.15002700 | -4.18856000 | -0.95861500 |
| C | 4.18263100 | -4.89860700 | 1.76977800  |
| H | 5.05967000 | -5.23326600 | 1.20154400  |
| H | 4.54974500 | -4.37170900 | 2.65860400  |
| H | 3.64675400 | -5.79608100 | 2.10175300  |
| C | 3.93286400 | 1.46146200  | 2.21125400  |
| H | 5.02467400 | 1.50709400  | 2.31606300  |
| H | 3.53541800 | 2.45500000  | 2.45624900  |
| H | 3.55836100 | 0.75515600  | 2.96248100  |
| C | 3.95416400 | 2.19713300  | -0.16373000 |
| H | 3.37856900 | 3.10358100  | 0.06586000  |
| H | 5.01617700 | 2.45178000  | -0.05170700 |
| H | 3.77392300 | 1.94554600  | -1.21573800 |

### 3

| Atom | x           | y           | z          |
|------|-------------|-------------|------------|
| C    | 1.99468800  | -0.80034700 | 2.99426900 |
| C    | 2.04220600  | -0.61630600 | 4.37302200 |
| C    | 0.92230600  | -0.10659700 | 5.02276300 |
| C    | -0.20716300 | 0.23795600  | 4.28606600 |
| C    | -0.20040500 | 0.03161600  | 2.91029800 |
| N    | 0.87057900  | -0.51735000 | 2.30330300 |
| H    | 0.93895100  | 0.04726200  | 6.09758600 |
| H    | 2.94367900  | -0.85837800 | 4.92927000 |
| H    | -1.07396300 | 0.67619800  | 4.77238500 |
| C    | 3.10121500  | -1.19842000 | 2.12181000 |
| C    | -1.23122400 | 0.45528100  | 1.95951100 |
| N    | -0.92904600 | 0.23006200  | 0.71048400 |
| N    | 2.81546800  | -1.15020300 | 0.85207400 |
| C    | -2.43724900 | 1.15858300  | 2.47434400 |
| H    | -2.12741600 | 2.04082300  | 3.05054900 |
| H    | -3.10404400 | 1.48454000  | 1.67434300 |
| H    | -3.00258500 | 0.50093800  | 3.14773400 |
| C    | 4.42524700  | -1.52767800 | 2.71718000 |
| H    | 4.37260100  | -2.48352500 | 3.25559700 |

|    |             |             |             |
|----|-------------|-------------|-------------|
| H  | 5.20653400  | -1.59705000 | 1.95672100  |
| H  | 4.72148000  | -0.76562400 | 3.44784700  |
| C  | -1.77972300 | 0.77349100  | -0.29935800 |
| C  | -1.39941100 | 2.00671900  | -0.85767600 |
| C  | -2.92423500 | 0.08128800  | -0.73394600 |
| C  | -2.24017400 | 2.60491400  | -1.79435800 |
| C  | -3.73274500 | 0.72388100  | -1.66622700 |
| C  | -3.40574500 | 1.97229000  | -2.17580000 |
| H  | -1.98878200 | 3.56045200  | -2.24869800 |
| C  | 3.83693900  | -1.31417200 | -0.13550200 |
| C  | 4.29479300  | -2.58231700 | -0.53435600 |
| C  | 4.30425500  | -0.12834800 | -0.74452600 |
| C  | 5.24754700  | -2.63770600 | -1.55575100 |
| C  | 5.25365600  | -0.24353200 | -1.75801600 |
| C  | 5.72318300  | -1.48710000 | -2.16455500 |
| H  | 5.61878000  | -3.60887500 | -1.87893300 |
| H  | 5.63165500  | 0.65423000  | -2.24160100 |
| H  | 6.46268700  | -1.55603800 | -2.95881500 |
| C  | 3.80289900  | -3.87755900 | 0.08197600  |
| H  | 2.97769200  | -3.63650500 | 0.76863000  |
| C  | 3.82307600  | 1.23402300  | -0.27766000 |
| H  | 2.76012200  | 1.12849900  | 0.00622200  |
| C  | -3.25401800 | -1.30740300 | -0.21644900 |
| H  | -2.30331200 | -1.70126800 | 0.17022900  |
| C  | -0.08405600 | 2.64778900  | -0.44631300 |
| H  | 0.61814200  | 1.80772400  | -0.30872300 |
| C  | 0.75508900  | -0.94010800 | -1.55859700 |
| H  | -0.22602500 | -0.55653300 | -1.86801500 |
| H  | 1.37410200  | -0.06746400 | -1.24868700 |
| C  | 1.47389500  | -1.57004200 | -2.73780300 |
| H  | 0.86480400  | -2.38945300 | -3.14887300 |
| H  | 2.41924200  | -2.01803300 | -2.39834500 |
| C  | 1.76816900  | -0.55679100 | -3.83314000 |
| H  | 0.84904400  | -0.08714500 | -4.20924700 |
| H  | 2.43314700  | 0.24028000  | -3.47100500 |
| H  | 2.26538300  | -1.03573400 | -4.68373800 |
| Co | 0.81872400  | -0.86897300 | 0.49606600  |
| C  | 0.29056400  | -2.57389600 | -0.60669100 |
| H  | 1.10510400  | -3.17019700 | -1.01371600 |
| H  | -0.62020100 | -2.66095600 | -1.20525500 |
| C  | 0.13699300  | -2.66637200 | 0.82037400  |
| H  | -0.87029300 | -2.68370000 | 1.24318200  |
| H  | 0.84630100  | -3.29249300 | 1.36688400  |
| F  | -4.86113700 | 0.15288600  | -2.09119800 |

|   |             |             |             |
|---|-------------|-------------|-------------|
| F | -4.22640000 | 2.53714100  | -3.05728000 |
| C | -4.19139400 | -1.27901000 | 0.97638700  |
| C | -5.37117400 | -0.53039500 | 0.98070900  |
| C | -3.87206700 | -2.03373200 | 2.10693800  |
| C | -6.19541500 | -0.52034400 | 2.10087100  |
| H | -5.65388100 | 0.04152300  | 0.09916600  |
| C | -4.69816400 | -2.03013100 | 3.22736800  |
| H | -2.96276500 | -2.63704500 | 2.10412700  |
| C | -5.86025300 | -1.26488600 | 3.22904900  |
| H | -7.10917200 | 0.06949900  | 2.09037700  |
| H | -4.43410700 | -2.62658300 | 4.09799100  |
| H | -6.50826900 | -1.25517500 | 4.10236300  |
| C | -3.66208900 | -2.27935900 | -1.31999500 |
| C | -4.71609100 | -3.17690600 | -1.16245300 |
| C | -2.91273300 | -2.33116900 | -2.50115900 |
| C | -5.01301000 | -4.10427500 | -2.15882700 |
| H | -5.31498900 | -3.15573600 | -0.25442500 |
| C | -3.20602600 | -3.25677300 | -3.49461300 |
| H | -2.09503400 | -1.62333900 | -2.65270100 |
| C | -4.26067500 | -4.15010900 | -3.32591400 |
| H | -5.84222700 | -4.79397300 | -2.01769500 |
| H | -2.61254800 | -3.27641600 | -4.40624200 |
| H | -4.49512800 | -4.87401400 | -4.10262500 |
| C | 0.51392700  | 3.50873200  | -1.54826100 |
| C | 0.79367400  | 2.90168000  | -2.77800800 |
| C | 0.83847900  | 4.85339900  | -1.38047800 |
| C | 1.38597500  | 3.61245000  | -3.81158100 |
| H | 0.54220100  | 1.84972000  | -2.92039000 |
| C | 1.43562100  | 5.57071600  | -2.41756900 |
| H | 0.63597900  | 5.34871800  | -0.43292800 |
| C | 1.71330100  | 4.95549800  | -3.63183900 |
| H | 1.59920700  | 3.11480300  | -4.75609500 |
| H | 1.68416400  | 6.61918300  | -2.26903700 |
| H | 2.18063500  | 5.51790300  | -4.43664000 |
| C | -0.15601600 | 3.33603000  | 0.90157100  |
| C | 0.87817100  | 3.15443400  | 1.82338700  |
| C | -1.21756500 | 4.17676200  | 1.24071600  |
| C | 0.84707100  | 3.78353600  | 3.06435500  |
| H | 1.71818600  | 2.50590800  | 1.56093700  |
| C | -1.24744400 | 4.81613700  | 2.47673700  |
| H | -2.03001500 | 4.32818700  | 0.52993100  |
| C | -0.21922000 | 4.61587900  | 3.39478200  |
| H | 1.65812100  | 3.62491800  | 3.77256800  |
| H | -2.07900900 | 5.47174400  | 2.72516600  |

|   |             |             |             |
|---|-------------|-------------|-------------|
| H | -0.24577700 | 5.11374600  | 4.36120100  |
| C | 4.90534200  | -4.56705100 | 0.88713600  |
| H | 4.52179500  | -5.47570100 | 1.36715100  |
| H | 5.73347700  | -4.86682900 | 0.23213600  |
| H | 5.32291100  | -3.92090300 | 1.66689300  |
| C | 3.27265800  | -4.85170000 | -0.97107200 |
| H | 2.76986100  | -5.69876100 | -0.48894300 |
| H | 2.56215000  | -4.38454900 | -1.66403700 |
| H | 4.08956800  | -5.26266100 | -1.57757000 |
| C | 4.58482000  | 1.69722300  | 0.96611800  |
| H | 5.66346600  | 1.72674600  | 0.76216900  |
| H | 4.27408500  | 2.70996600  | 1.25379000  |
| H | 4.42796100  | 1.04260800  | 1.83193500  |
| C | 3.91170700  | 2.31443300  | -1.34724000 |
| H | 3.44775400  | 2.00799000  | -2.29301300 |
| H | 3.39665700  | 3.22222000  | -1.00667300 |
| H | 4.95329700  | 2.59357000  | -1.55294000 |

#### Quartet:

1

| Atom | x           | y           | z           |
|------|-------------|-------------|-------------|
| C    | 0.00645800  | 0.17358400  | 2.85394700  |
| C    | -0.05630900 | 0.16419600  | 4.24374700  |
| C    | 1.05814000  | -0.28431600 | 4.94791500  |
| C    | 2.18857100  | -0.72132200 | 4.26469500  |
| C    | 2.16107600  | -0.71082900 | 2.87227000  |
| N    | 1.09755000  | -0.24793400 | 2.21174200  |
| H    | 1.04266700  | -0.29845900 | 6.03402000  |
| H    | -0.95045900 | 0.49290300  | 4.76598100  |
| H    | 3.06173700  | -1.07349500 | 4.80594100  |
| C    | -1.07086100 | 0.64951300  | 1.94451800  |
| C    | 3.24745300  | -1.18969800 | 1.97831700  |
| N    | 2.89401500  | -1.36077300 | 0.75162700  |
| N    | -0.88745700 | 0.36365100  | 0.69979500  |
| C    | 4.60853400  | -1.38165900 | 2.54317300  |
| H    | 4.98537000  | -0.43104100 | 2.94385100  |
| H    | 4.58174700  | -2.09001400 | 3.38083200  |
| H    | 5.30964000  | -1.75445700 | 1.79317900  |
| C    | -2.20546800 | 1.40255100  | 2.53602700  |
| H    | -2.74884300 | 0.75439400  | 3.23746400  |
| H    | -1.82589700 | 2.26566800  | 3.09820100  |
| H    | -2.91052700 | 1.74833300  | 1.77810800  |
| C    | 3.83960500  | -1.69932300 | -0.26646100 |

|    |             |             |             |
|----|-------------|-------------|-------------|
| C  | 3.90054400  | -3.02958500 | -0.72049500 |
| C  | 4.58543600  | -0.66852500 | -0.86588500 |
| C  | 4.74240900  | -3.31061900 | -1.79516900 |
| C  | 5.40915000  | -1.00628700 | -1.94143300 |
| C  | 5.48876200  | -2.31040700 | -2.40600600 |
| H  | 4.81244100  | -4.33183100 | -2.16314600 |
| H  | 5.99350200  | -0.22460200 | -2.42472800 |
| H  | 6.13331800  | -2.55100900 | -3.24796500 |
| C  | -1.78944400 | 0.86255100  | -0.28330900 |
| C  | -1.47856500 | 2.08188200  | -0.90280400 |
| C  | -2.91006300 | 0.09776000  | -0.63931700 |
| C  | -2.38006400 | 2.60189600  | -1.82824200 |
| C  | -3.80570200 | 0.68108800  | -1.53039300 |
| C  | -3.54520100 | 1.91572200  | -2.11172200 |
| H  | -2.18084300 | 3.53988000  | -2.34248900 |
| C  | -0.16056100 | 2.76620100  | -0.57616300 |
| H  | 0.56092600  | 1.93538500  | -0.46036300 |
| C  | -3.08646200 | -1.30134000 | -0.07321900 |
| H  | -2.05798600 | -1.65346800 | 0.11833700  |
| C  | 4.51848700  | 0.77760100  | -0.41094000 |
| H  | 3.79998600  | 0.85176900  | 0.42131100  |
| C  | 3.13084000  | -4.13503300 | -0.02653900 |
| H  | 2.23458500  | -3.68256300 | 0.42775200  |
| C  | 0.92748000  | -0.74456000 | -1.81022900 |
| H  | 0.18039000  | -0.10747800 | -2.30997000 |
| H  | 1.88544700  | -0.59490700 | -2.33491800 |
| C  | 0.50622700  | -2.21369600 | -1.91815400 |
| H  | -0.50455800 | -2.35538900 | -1.49693200 |
| H  | 1.17048500  | -2.84293800 | -1.30357600 |
| C  | 0.51995900  | -2.74218400 | -3.34543200 |
| H  | -0.10301700 | -2.11626700 | -3.99908700 |
| H  | 1.54031600  | -2.72347400 | -3.75312200 |
| H  | 0.14446400  | -3.77194200 | -3.41060100 |
| Co | 1.02849300  | -0.47081900 | 0.14161300  |
| C  | 3.96798600  | -4.74389500 | 1.09924000  |
| H  | 4.26796400  | -3.99966200 | 1.84601800  |
| H  | 3.41305700  | -5.53707400 | 1.61544100  |
| H  | 4.88590200  | -5.18841800 | 0.69202900  |
| C  | 2.66921000  | -5.24026200 | -0.97009700 |
| H  | 3.50947300  | -5.86101900 | -1.30621600 |
| H  | 1.97039700  | -5.90779300 | -0.45270100 |
| H  | 2.16539400  | -4.84591200 | -1.86060800 |
| C  | 5.87338400  | 1.26043800  | 0.10391400  |
| H  | 6.61816300  | 1.27030100  | -0.70184200 |

|   |             |             |             |
|---|-------------|-------------|-------------|
| H | 5.79865500  | 2.28334200  | 0.49266100  |
| H | 6.26554600  | 0.61863800  | 0.90264000  |
| C | 4.01176900  | 1.69339600  | -1.52362200 |
| H | 3.89938600  | 2.72306800  | -1.16007400 |
| H | 4.70915100  | 1.71756800  | -2.37034500 |
| H | 3.03887400  | 1.36151100  | -1.90756300 |
| C | 0.34801800  | 3.61695900  | -1.72809400 |
| C | 0.85637700  | 2.96831700  | -2.85874100 |
| C | 0.30182800  | 5.01018400  | -1.71923700 |
| C | 1.31395800  | 3.69356500  | -3.95091500 |
| H | 0.89136800  | 1.87802600  | -2.87591900 |
| C | 0.75377800  | 5.73935800  | -2.81788200 |
| H | -0.08190800 | 5.53535900  | -0.84653500 |
| C | 1.26149800  | 5.08558700  | -3.93392200 |
| H | 1.71092300  | 3.17149300  | -4.81867100 |
| H | 0.70997400  | 6.82589400  | -2.79516900 |
| H | 1.61592700  | 5.65685100  | -4.78868900 |
| C | -0.18474700 | 3.49777700  | 0.75052700  |
| C | 0.92219600  | 3.42003200  | 1.59947100  |
| C | -1.27487400 | 4.27710600  | 1.14292300  |
| C | 0.93821800  | 4.09250500  | 2.81744400  |
| H | 1.78951300  | 2.83252400  | 1.29030800  |
| C | -1.25784300 | 4.96387200  | 2.35357100  |
| H | -2.14683700 | 4.34321100  | 0.49221000  |
| C | -0.15467000 | 4.86734400  | 3.19781000  |
| H | 1.80986500  | 4.02407400  | 3.46488600  |
| H | -2.11192600 | 5.57360100  | 2.63976100  |
| H | -0.14286600 | 5.40252400  | 4.14437800  |
| C | -3.77766800 | -1.27691300 | 1.27358700  |
| C | -4.98883900 | -0.60325100 | 1.45045100  |
| C | -3.20379100 | -1.92888000 | 2.36599500  |
| C | -5.60082400 | -0.56657600 | 2.69813700  |
| H | -5.45693900 | -0.11466100 | 0.59638500  |
| C | -3.81152500 | -1.88992500 | 3.61909800  |
| H | -2.26892000 | -2.47562200 | 2.23016700  |
| C | -5.00975200 | -1.20279700 | 3.78855000  |
| H | -6.54533900 | -0.04155600 | 2.82107700  |
| H | -3.35063400 | -2.40312500 | 4.46084300  |
| H | -5.48925700 | -1.17097100 | 4.76408900  |
| C | -3.66386400 | -2.29585800 | -1.07245700 |
| C | -3.10692500 | -2.36650900 | -2.35399000 |
| C | -4.67963400 | -3.18758800 | -0.73576300 |
| C | -3.55474600 | -3.30289400 | -3.27559800 |
| H | -2.31719800 | -1.66835200 | -2.63492100 |

|   |             |             |             |
|---|-------------|-------------|-------------|
| C | -5.13162600 | -4.12699500 | -1.66067400 |
| H | -5.12704600 | -3.15198500 | 0.25547700  |
| C | -4.57250700 | -4.18948200 | -2.93074400 |
| H | -3.10973000 | -3.33869900 | -4.26785600 |
| H | -5.92933000 | -4.81181900 | -1.38155600 |
| H | -4.92893200 | -4.92191700 | -3.65121700 |
| F | -4.94438800 | 0.06475800  | -1.84726400 |
| F | -4.43287000 | 2.41829600  | -2.96637600 |

## 2

| Atom | x           | y           | z           |
|------|-------------|-------------|-------------|
| C    | 1.97794700  | -0.74268300 | 2.98831700  |
| C    | 1.99171200  | -0.62806100 | 4.37662200  |
| C    | 0.84225300  | -0.17058200 | 5.01298800  |
| C    | -0.26999100 | 0.18812300  | 4.25938800  |
| C    | -0.20457400 | 0.04975400  | 2.87383900  |
| N    | 0.89108000  | -0.42559600 | 2.27948000  |
| H    | 0.81956400  | -0.07579000 | 6.09475300  |
| H    | 2.87732900  | -0.88796200 | 4.94973300  |
| H    | -1.16119700 | 0.57972500  | 4.74077800  |
| C    | 3.14025800  | -1.13184900 | 2.15105100  |
| C    | -1.25642600 | 0.49042600  | 1.92279600  |
| N    | -1.01986100 | 0.21871100  | 0.68360000  |
| N    | 2.89670600  | -1.20945700 | 0.88949000  |
| C    | -2.42651000 | 1.23325300  | 2.46367100  |
| H    | -2.09287200 | 2.09678400  | 3.05212500  |
| H    | -3.09472800 | 1.57932200  | 1.67292500  |
| H    | -3.00173200 | 0.57533500  | 3.12969500  |
| C    | 4.45986200  | -1.33892700 | 2.80870800  |
| H    | 4.43547600  | -2.26630800 | 3.39742100  |
| H    | 5.26961600  | -1.41278500 | 2.07911200  |
| H    | 4.68301500  | -0.52428300 | 3.50726100  |
| C    | -1.85852400 | 0.77861800  | -0.32511500 |
| C    | -1.45305600 | 1.99512600  | -0.90289700 |
| C    | -3.01147200 | 0.09632500  | -0.74163600 |
| C    | -2.28802400 | 2.58549000  | -1.84944800 |
| C    | -3.80916600 | 0.72820600  | -1.69011000 |
| C    | -3.46202900 | 1.96082700  | -2.22159500 |
| H    | -2.02567100 | 3.52784500  | -2.32433200 |
| C    | 3.95126400  | -1.36120200 | -0.06414800 |
| C    | 4.41225900  | -2.63183700 | -0.43687400 |
| C    | 4.42556600  | -0.17990600 | -0.66937800 |
| C    | 5.41180300  | -2.69824900 | -1.41145500 |
| C    | 5.42336600  | -0.30353800 | -1.63389400 |

|    |             |             |             |
|----|-------------|-------------|-------------|
| C  | 5.91928700  | -1.54989300 | -1.99967100 |
| H  | 5.79078900  | -3.67188000 | -1.71840700 |
| H  | 5.81362200  | 0.59044500  | -2.11550200 |
| H  | 6.69650300  | -1.62450700 | -2.75649600 |
| C  | 3.85230300  | -3.90739900 | 0.15776700  |
| H  | 2.98215400  | -3.63734300 | 0.77601200  |
| C  | 3.87425900  | 1.17855600  | -0.27687500 |
| H  | 2.81735700  | 1.02573800  | 0.00494900  |
| C  | -3.35681500 | -1.27351500 | -0.18653900 |
| H  | -2.40483200 | -1.66934100 | 0.19952400  |
| C  | -0.11586500 | 2.60725300  | -0.51037100 |
| H  | 0.56814800  | 1.74814500  | -0.39346200 |
| C  | 1.00597900  | -0.52101200 | -1.76837400 |
| H  | -0.00776600 | -0.23344100 | -2.10448000 |
| H  | 1.60164000  | 0.41027200  | -1.79985700 |
| C  | 1.59329000  | -1.49662100 | -2.77876400 |
| H  | 0.92715200  | -2.36662100 | -2.89700500 |
| H  | 2.55416900  | -1.90078200 | -2.41909200 |
| C  | 1.81874100  | -0.85716300 | -4.14252200 |
| H  | 0.88096900  | -0.45430200 | -4.54994400 |
| H  | 2.53041900  | -0.02227800 | -4.06741900 |
| H  | 2.22179200  | -1.56871200 | -4.87411300 |
| Co | 0.84824600  | -0.90707500 | 0.20580000  |
| C  | 0.16985100  | -2.91851800 | -0.27724200 |
| H  | 1.03862500  | -3.36405500 | -0.76039900 |
| H  | -0.70600100 | -2.77166200 | -0.91125900 |
| C  | 0.09279900  | -2.83323400 | 1.07690000  |
| H  | -0.84316500 | -2.59176900 | 1.57959500  |
| H  | 0.89638000  | -3.20230600 | 1.71245700  |
| F  | -4.94531700 | 0.16320000  | -2.10079000 |
| F  | -4.27309400 | 2.52236800  | -3.11490300 |
| C  | -4.28303400 | -1.20175400 | 1.01318300  |
| C  | -5.42964300 | -0.40330900 | 1.02273600  |
| C  | -3.98556200 | -1.95864500 | 2.14851900  |
| C  | -6.24062400 | -0.34704000 | 2.15124900  |
| H  | -5.69909100 | 0.17143400  | 0.13905300  |
| C  | -4.79745300 | -1.90767900 | 3.27827500  |
| H  | -3.10681500 | -2.60587900 | 2.13992200  |
| C  | -5.92501000 | -1.09236800 | 3.28421700  |
| H  | -7.12854000 | 0.28110300  | 2.14384700  |
| H  | -4.54978400 | -2.50646900 | 4.15217300  |
| H  | -6.56189100 | -1.04569900 | 4.16440900  |
| C  | -3.78361700 | -2.25989100 | -1.26822900 |
| C  | -4.91843600 | -3.05801400 | -1.14901000 |

|   |             |             |             |
|---|-------------|-------------|-------------|
| C | -2.97199900 | -2.40934100 | -2.39868600 |
| C | -5.23432500 | -3.98868700 | -2.13673500 |
| H | -5.56582400 | -2.95579400 | -0.28075400 |
| C | -3.28495600 | -3.33815600 | -3.38278100 |
| H | -2.09091700 | -1.77466100 | -2.51526500 |
| C | -4.42074900 | -4.13382300 | -3.25365000 |
| H | -6.12660500 | -4.60138500 | -2.02947700 |
| H | -2.64274300 | -3.43727400 | -4.25510700 |
| H | -4.66985100 | -4.86052100 | -4.02320600 |
| C | 0.49240800  | 3.47740500  | -1.60434400 |
| C | 0.68375600  | 2.92665500  | -2.87870800 |
| C | 0.93456400  | 4.78030800  | -1.37318300 |
| C | 1.30212100  | 3.65245900  | -3.88713900 |
| H | 0.35312900  | 1.90768100  | -3.07677100 |
| C | 1.55548200  | 5.51104300  | -2.38599100 |
| H | 0.80614700  | 5.23469600  | -0.39289700 |
| C | 1.74394600  | 4.95127900  | -3.64292400 |
| H | 1.44437800  | 3.19853600  | -4.86599200 |
| H | 1.89294700  | 6.52524600  | -2.18421000 |
| H | 2.23095000  | 5.52151000  | -4.43051100 |
| C | -0.15428600 | 3.28614600  | 0.84371000  |
| C | 0.86460000  | 3.04425400  | 1.76872400  |
| C | -1.16469100 | 4.18883900  | 1.18069200  |
| C | 0.87167400  | 3.67837200  | 3.00792200  |
| H | 1.66055200  | 2.33983900  | 1.51340500  |
| C | -1.15889600 | 4.82975600  | 2.41597100  |
| H | -1.96161800 | 4.39004600  | 0.46479100  |
| C | -0.14352300 | 4.57339200  | 3.33507800  |
| H | 1.67225900  | 3.47331700  | 3.71657000  |
| H | -1.95036300 | 5.53406000  | 2.66186400  |
| H | -0.14063700 | 5.07653100  | 4.29913000  |
| C | 4.87191100  | -4.59977300 | 1.06080900  |
| H | 4.44362000  | -5.50439700 | 1.50994700  |
| H | 5.75757900  | -4.90450400 | 0.48849500  |
| H | 5.21613600  | -3.94735500 | 1.87167700  |
| C | 3.37424300  | -4.87449700 | -0.92434500 |
| H | 2.81799700  | -5.70737200 | -0.47688600 |
| H | 2.72600300  | -4.38474300 | -1.66231600 |
| H | 4.21965400  | -5.30747700 | -1.47327500 |
| C | 4.60635200  | 1.76194800  | 0.93245400  |
| H | 5.68302100  | 1.83444000  | 0.72919500  |
| H | 4.24144200  | 2.77389900  | 1.15085900  |
| H | 4.48180300  | 1.15987800  | 1.84114800  |
| C | 3.89917600  | 2.19054800  | -1.41561000 |

|   |            |            |             |
|---|------------|------------|-------------|
| H | 3.45362600 | 1.79015900 | -2.33474500 |
| H | 3.33348900 | 3.08859400 | -1.13281500 |
| H | 4.92236600 | 2.51491200 | -1.64628800 |

### TS-2/3

| Atom | x           | y           | z           |
|------|-------------|-------------|-------------|
| C    | 1.97703700  | -1.16285700 | 2.87278500  |
| C    | 1.92863200  | -1.34553100 | 4.25157400  |
| C    | 0.74296700  | -1.05161200 | 4.92047000  |
| C    | -0.34758600 | -0.55200400 | 4.21381300  |
| C    | -0.22885900 | -0.38886300 | 2.83636000  |
| N    | 0.90567200  | -0.71261300 | 2.20302900  |
| H    | 0.67472700  | -1.19663500 | 5.99467000  |
| H    | 2.79677000  | -1.70609300 | 4.79626600  |
| H    | -1.26868700 | -0.29245100 | 4.72791900  |
| C    | 3.16226100  | -1.35750900 | 2.01124400  |
| C    | -1.24939500 | 0.20006700  | 1.94401400  |
| N    | -1.00278000 | 0.09558400  | 0.67308000  |
| N    | 2.94536800  | -1.22371100 | 0.74287700  |
| C    | -2.41092300 | 0.88586900  | 2.57179100  |
| H    | -2.05404300 | 1.68537900  | 3.23454000  |
| H    | -3.08932100 | 1.31694800  | 1.83382200  |
| H    | -2.97699900 | 0.17170600  | 3.18464400  |
| C    | 4.47518100  | -1.65342800 | 2.64822500  |
| H    | 4.46912500  | -2.67835200 | 3.04403500  |
| H    | 5.29854500  | -1.56558300 | 1.93526400  |
| H    | 4.66326100  | -0.98349700 | 3.49492200  |
| C    | -1.86944700 | 0.75706300  | -0.24654800 |
| C    | -1.52819900 | 2.05362200  | -0.66553600 |
| C    | -3.01078600 | 0.09161400  | -0.72593100 |
| C    | -2.40821000 | 2.73219900  | -1.50713900 |
| C    | -3.86926900 | 0.81999500  | -1.54260600 |
| C    | -3.57716000 | 2.12378000  | -1.91843500 |
| H    | -2.18864100 | 3.73777600  | -1.85837000 |
| C    | 4.01038700  | -1.18406700 | -0.20777100 |
| C    | 4.55419200  | -2.36143400 | -0.74486800 |
| C    | 4.41207200  | 0.09515900  | -0.64854900 |
| C    | 5.54042800  | -2.23245200 | -1.72686000 |
| C    | 5.39756300  | 0.16556700  | -1.63113500 |
| C    | 5.96090200  | -0.98711600 | -2.16751900 |
| H    | 5.98154700  | -3.13174900 | -2.15400500 |
| H    | 5.73013200  | 1.13800900  | -1.98770400 |
| H    | 6.72804500  | -0.91082500 | -2.93440800 |
| C    | 4.10552400  | -3.74301200 | -0.31387700 |

|    |             |             |             |
|----|-------------|-------------|-------------|
| H  | 3.25227000  | -3.62474700 | 0.37081700  |
| C  | 3.81436600  | 1.35165400  | -0.04098700 |
| H  | 2.76469800  | 1.12057300  | 0.22059200  |
| C  | -3.27085200 | -1.35880600 | -0.35650000 |
| H  | -2.27591800 | -1.77052000 | -0.13030200 |
| C  | -0.21908600 | 2.67894700  | -0.20888400 |
| H  | 0.51146900  | 1.85108000  | -0.18121500 |
| C  | 0.91488200  | -0.58811100 | -1.83819900 |
| H  | -0.07667000 | -0.21874000 | -2.13506500 |
| H  | 1.45393400  | 0.25854700  | -1.35447100 |
| C  | 1.73191900  | -1.01788300 | -3.03823600 |
| H  | 1.20786600  | -1.82237400 | -3.57599200 |
| H  | 2.68872700  | -1.44358800 | -2.69582600 |
| C  | 2.00983600  | 0.12332100  | -4.00536400 |
| H  | 1.07822500  | 0.56548300  | -4.38368300 |
| H  | 2.59070000  | 0.92283700  | -3.52585200 |
| H  | 2.58534900  | -0.22541400 | -4.87052600 |
| Co | 0.85557900  | -0.98108700 | 0.25466700  |
| C  | 0.43606100  | -2.49901800 | -1.17405200 |
| H  | 1.29793900  | -2.92796200 | -1.68225900 |
| H  | -0.44989600 | -2.45262500 | -1.81141100 |
| C  | 0.25475600  | -2.90248200 | 0.18973500  |
| H  | -0.75468700 | -3.02764500 | 0.58431500  |
| H  | 1.00252400  | -3.55367100 | 0.64575800  |
| F  | -5.00932400 | 0.28326700  | -1.97896300 |
| F  | -4.43851100 | 2.77061700  | -2.70005900 |
| C  | -4.06464200 | -1.48952900 | 0.92799800  |
| C  | -5.26077500 | -0.79533800 | 1.12838900  |
| C  | -3.59386400 | -2.32385500 | 1.94343500  |
| C  | -5.95517700 | -0.91825800 | 2.32679200  |
| H  | -5.65512200 | -0.16146200 | 0.33562800  |
| C  | -4.28515500 | -2.44705800 | 3.14590100  |
| H  | -2.67396700 | -2.88909900 | 1.78508300  |
| C  | -5.46620100 | -1.73763300 | 3.34216100  |
| H  | -6.88537900 | -0.37282100 | 2.46876200  |
| H  | -3.90405300 | -3.10282800 | 3.92601200  |
| H  | -6.01120300 | -1.83027900 | 4.27867600  |
| C  | -3.78994900 | -2.19645700 | -1.51898900 |
| C  | -4.89080000 | -3.04137800 | -1.40038300 |
| C  | -3.09831300 | -2.16485400 | -2.73488200 |
| C  | -5.29354000 | -3.83410900 | -2.47312600 |
| H  | -5.44315800 | -3.08492900 | -0.46405300 |
| C  | -3.49818500 | -2.95427100 | -3.80510700 |
| H  | -2.24046900 | -1.49859900 | -2.84829800 |

|   |             |             |             |
|---|-------------|-------------|-------------|
| C | -4.60154000 | -3.79448500 | -3.67704000 |
| H | -6.15759300 | -4.48551400 | -2.36244500 |
| H | -2.94905800 | -2.91211100 | -4.74318300 |
| H | -4.91886100 | -4.41278900 | -4.51336100 |
| C | 0.33799000  | 3.67574800  | -1.21507000 |
| C | 0.63703300  | 3.21536800  | -2.50294400 |
| C | 0.61166700  | 5.00620000  | -0.90315700 |
| C | 1.20012400  | 4.05654700  | -3.45175500 |
| H | 0.42978500  | 2.17450400  | -2.75688300 |
| C | 1.17852500  | 5.85373400  | -1.85519200 |
| H | 0.39482400  | 5.38856900  | 0.09214000  |
| C | 1.47673800  | 5.38377900  | -3.12780500 |
| H | 1.42971400  | 3.67451300  | -4.44483100 |
| H | 1.38794000  | 6.88854000  | -1.59353900 |
| H | 1.92078300  | 6.04684500  | -3.86648100 |
| C | -0.28440100 | 3.21190800  | 1.20825200  |
| C | 0.75852000  | 2.93790300  | 2.09635900  |
| C | -1.34889100 | 4.00168400  | 1.64744600  |
| C | 0.73407100  | 3.42403400  | 3.40029500  |
| H | 1.60018400  | 2.32891400  | 1.75717400  |
| C | -1.37246100 | 4.49898500  | 2.94698800  |
| H | -2.16757800 | 4.22719100  | 0.96382500  |
| C | -0.33500800 | 4.20587900  | 3.82950300  |
| H | 1.55356600  | 3.19520400  | 4.07893700  |
| H | -2.20630000 | 5.11654000  | 3.27314200  |
| H | -0.35731000 | 4.59207400  | 4.84581700  |
| C | 5.21414000  | -4.48322000 | 0.43370900  |
| H | 4.86649000  | -5.46978500 | 0.76414000  |
| H | 6.08293100  | -4.64190400 | -0.21806100 |
| H | 5.56158400  | -3.93249400 | 1.31533900  |
| C | 3.63880100  | -4.58554900 | -1.50082300 |
| H | 3.15362100  | -5.50549700 | -1.15269600 |
| H | 2.92955700  | -4.04794500 | -2.14227800 |
| H | 4.48430700  | -4.88350700 | -2.13381100 |
| C | 4.53527900  | 1.73647100  | 1.25192600  |
| H | 5.60414300  | 1.89534600  | 1.05644200  |
| H | 4.13042900  | 2.67182600  | 1.65988400  |
| H | 4.45285800  | 0.96815400  | 2.02996900  |
| C | 3.80172000  | 2.54858300  | -0.98338100 |
| H | 3.36743300  | 2.30897800  | -1.96168100 |
| H | 3.20890700  | 3.36406000  | -0.54820200 |
| H | 4.81265700  | 2.94298100  | -1.14841300 |

| Atom | x           | y           | z           |
|------|-------------|-------------|-------------|
| C    | 1.05353100  | -1.30638200 | 3.33690800  |
| C    | 0.80765800  | -1.31398000 | 4.70782300  |
| C    | -0.36996100 | -0.72968300 | 5.16660000  |
| C    | -1.25398700 | -0.12947600 | 4.27330500  |
| C    | -0.94199900 | -0.17182500 | 2.91759100  |
| N    | 0.15868900  | -0.79300300 | 2.49180000  |
| H    | -0.58697700 | -0.71707700 | 6.23103500  |
| H    | 1.52044800  | -1.74429000 | 5.40497400  |
| H    | -2.14966000 | 0.36963000  | 4.63074400  |
| C    | 2.31180400  | -1.74415400 | 2.67418800  |
| C    | -1.71814800 | 0.47198200  | 1.82116100  |
| N    | -1.13416100 | 0.43508000  | 0.67049500  |
| N    | 2.41229900  | -1.40500500 | 1.43372500  |
| C    | -3.00764900 | 1.12409100  | 2.15289700  |
| H    | -3.68301400 | 0.41907400  | 2.65266600  |
| H    | -2.81265000 | 1.95072000  | 2.85154100  |
| H    | -3.50335700 | 1.52923000  | 1.26967800  |
| C    | 3.35105700  | -2.43156800 | 3.48319500  |
| H    | 3.57280500  | -1.85492300 | 4.38971200  |
| H    | 2.99150100  | -3.41551900 | 3.81234200  |
| H    | 4.27582400  | -2.56204000 | 2.91658600  |
| C    | -1.73914300 | 0.92850600  | -0.51748600 |
| C    | -1.31190700 | 2.17549500  | -0.99809500 |
| C    | -2.61626900 | 0.08465400  | -1.23203500 |
| C    | -1.83977200 | 2.63491700  | -2.20293100 |
| C    | -3.13014600 | 0.60484100  | -2.41436100 |
| C    | -2.74857000 | 1.85529100  | -2.88808600 |
| H    | -1.54077000 | 3.59114600  | -2.62601600 |
| C    | 3.57553400  | -1.66183600 | 0.64883300  |
| C    | 3.86650400  | -2.94538300 | 0.15427000  |
| C    | 4.34427900  | -0.53152100 | 0.29785200  |
| C    | 4.97587000  | -3.07203900 | -0.68776400 |
| C    | 5.44090900  | -0.71680200 | -0.53903700 |
| C    | 5.75733700  | -1.97911400 | -1.03006600 |
| H    | 5.22557800  | -4.05403300 | -1.08670100 |
| H    | 6.05278900  | 0.13838700  | -0.81796100 |
| H    | 6.61403600  | -2.10744000 | -1.68728800 |
| C    | 3.03827900  | -4.17593700 | 0.47250900  |
| H    | 2.17528600  | -3.86859900 | 1.08229100  |
| C    | 3.98562000  | 0.83203000  | 0.85417800  |
| H    | 2.88196000  | 0.86934900  | 0.90248200  |
| C    | -2.93046500 | -1.30700000 | -0.68960500 |
| H    | -2.03101200 | -1.57525600 | -0.11499400 |

|    |             |             |             |
|----|-------------|-------------|-------------|
| C  | -0.26985700 | 2.95435900  | -0.20871000 |
| H  | 0.49186300  | 2.20864200  | 0.08050900  |
| C  | 0.85849500  | -1.22139400 | -1.39994700 |
| H  | 1.39052900  | -2.18474200 | -1.43524400 |
| H  | -0.06733200 | -1.35378300 | -1.97282500 |
| C  | 1.72186200  | -0.13823800 | -2.04568700 |
| H  | 2.42879700  | 0.30517300  | -1.31854600 |
| H  | 1.07801700  | 0.69099700  | -2.38435400 |
| C  | 2.55716800  | -0.64682300 | -3.21547400 |
| H  | 3.22775000  | -1.44206300 | -2.84501200 |
| H  | 1.89423100  | -1.12740500 | -3.95280600 |
| Co | 0.63380900  | -0.70353500 | 0.48824800  |
| C  | 3.38385600  | 0.43510700  | -3.89208100 |
| H  | 2.71054100  | 1.19291900  | -4.32245800 |
| H  | 3.98535900  | 0.95911200  | -3.13022000 |
| C  | 4.30143000  | -0.11845100 | -4.96778600 |
| H  | 4.87870700  | 0.67028800  | -5.46338700 |
| H  | 5.01579400  | -0.83584300 | -4.54170000 |
| H  | 3.73082800  | -0.64669000 | -5.74241300 |
| F  | -4.02417500 | -0.07117200 | -3.13356900 |
| F  | -3.27953700 | 2.28557200  | -4.03019500 |
| C  | -4.07591100 | -1.30104900 | 0.30683100  |
| C  | -5.22677100 | -0.53324800 | 0.12167800  |
| C  | -3.98593200 | -2.11777600 | 1.43687800  |
| C  | -6.26115500 | -0.57634700 | 1.05168900  |
| H  | -5.31412600 | 0.10785400  | -0.75530100 |
| C  | -5.01455400 | -2.15754400 | 2.37198300  |
| H  | -3.09603800 | -2.73526700 | 1.57479700  |
| C  | -6.15657000 | -1.38257800 | 2.18173200  |
| H  | -7.15387000 | 0.02401300  | 0.89197400  |
| H  | -4.93001800 | -2.79937100 | 3.24627800  |
| H  | -6.96560800 | -1.41305500 | 2.90771000  |
| C  | -3.08085000 | -2.44711500 | -1.69438400 |
| C  | -1.99190800 | -3.29361500 | -1.91640600 |
| C  | -4.28875800 | -2.74393100 | -2.33068600 |
| C  | -2.08491000 | -4.37471600 | -2.78759300 |
| H  | -1.05536100 | -3.11013400 | -1.39022800 |
| C  | -4.38601200 | -3.82250200 | -3.20042400 |
| H  | -5.16710600 | -2.13127400 | -2.14147200 |
| C  | -3.28262400 | -4.63729200 | -3.44089700 |
| H  | -1.21951900 | -5.01477800 | -2.94625900 |
| H  | -5.33436000 | -4.03168800 | -3.69043700 |
| H  | -3.36293600 | -5.48036200 | -4.12312300 |
| C  | -0.81110000 | 3.51822900  | 1.09119700  |

|   |             |             |             |
|---|-------------|-------------|-------------|
| C | -0.05285900 | 3.40477900  | 2.25917000  |
| C | -2.04415200 | 4.17058900  | 1.15449200  |
| C | -0.51156300 | 3.93137200  | 3.46250700  |
| H | 0.91229600  | 2.89412700  | 2.21756900  |
| C | -2.50147300 | 4.70959300  | 2.35360600  |
| H | -2.65691700 | 4.24629200  | 0.25576200  |
| C | -1.73880400 | 4.58875800  | 3.51217400  |
| H | 0.09185000  | 3.83430900  | 4.36258900  |
| H | -3.46048200 | 5.22193500  | 2.38376900  |
| H | -2.09787400 | 5.00787600  | 4.44918400  |
| C | 0.46378000  | 3.99224000  | -1.04131200 |
| C | 0.02909900  | 5.31338000  | -1.15996200 |
| C | 1.60944100  | 3.60133800  | -1.73719800 |
| C | 0.72335000  | 6.21639100  | -1.96069400 |
| H | -0.85229200 | 5.64659000  | -0.61473800 |
| C | 2.31003600  | 4.50221600  | -2.53058000 |
| H | 1.95813900  | 2.57230100  | -1.64778400 |
| C | 1.86520600  | 5.81564700  | -2.64664500 |
| H | 0.37110900  | 7.24224100  | -2.04177400 |
| H | 3.20663800  | 4.17713200  | -3.05548800 |
| H | 2.40865400  | 6.52574300  | -3.26538300 |
| C | 2.48968600  | -4.84240400 | -0.78918600 |
| H | 3.29811900  | -5.24408500 | -1.41222300 |
| H | 1.83812400  | -5.68312200 | -0.52134500 |
| H | 1.91039700  | -4.14945900 | -1.41068100 |
| C | 3.85104300  | -5.19548100 | 1.27229300  |
| H | 4.68999200  | -5.57468900 | 0.67544100  |
| H | 4.27179900  | -4.77291800 | 2.19208400  |
| H | 3.22988000  | -6.05672300 | 1.54706100  |
| C | 4.51674700  | 1.00352400  | 2.27741300  |
| H | 5.61321000  | 0.94953100  | 2.28173100  |
| H | 4.22795200  | 1.98061800  | 2.68497600  |
| H | 4.14697100  | 0.23044300  | 2.96222000  |
| C | 4.45170400  | 1.99645900  | -0.00835300 |
| H | 4.03068100  | 2.93595600  | 0.37079800  |
| H | 5.54357600  | 2.10402700  | 0.01105700  |
| H | 4.14103500  | 1.88713900  | -1.05551800 |

### C<sub>2</sub>H<sub>4</sub>

| Atom | x           | y           | z           |
|------|-------------|-------------|-------------|
| C    | 0.66343500  | 0.00000600  | 0.00030100  |
| H    | 1.23805800  | -0.92465000 | -0.00091400 |
| H    | 1.23828100  | 0.92451300  | -0.00094800 |
| C    | -0.66335800 | 0.00000500  | 0.00034000  |

|   |             |             |             |
|---|-------------|-------------|-------------|
| H | -1.23837700 | 0.92437000  | -0.00097700 |
| H | -1.23842400 | -0.92430200 | -0.00101000 |
